# Supplementary material for: Imbalanced Regulation of Fungal Nutrient Transports According to Phosphate Availability in a Symbiocosm Formed by Poplar, Sorghum, and Rhizophagus irregularis
Source: Front Plant Sci. 2019 Dec 12;10:1617. doi: 10.3389/fpls.2019.01617 (PMC6920215; doi:10.3389/fpls.2019.01617)
Supplement: Table S4 — P. trichocarpa and S. bicolor transporters regulated by mycorrhizal symbiosis and P treatment. [file Table_4.pdf]

| Name               | Impact of mycorrhization |               | Impact of Phosphate   |               | Name               | Impact of mycorrhization |               | Impact of Phosphate   |               | In non mycorrhized plants |               | Impact of phosphate   |               |       |
|--------------------|--------------------------|---------------|-----------------------|---------------|--------------------|--------------------------|---------------|-----------------------|---------------|---------------------------|---------------|-----------------------|---------------|-------|
|                    | [Myc: HP VS. Myc: LP]    |               | [Myc: HP VS. Myc: LP] |               |                    | [Myc: LP VS. Myc: LP]    |               | [Myc: HP VS. Myc: HP] |               | Baggerley FDR             |               | In mycorrhized plants |               |       |
|                    | Baggerley FDR            | Baggerley FDR | Baggerley FDR         | Baggerley FDR |                    | Baggerley FDR            | Baggerley FDR | Baggerley FDR         | Baggerley FDR | Baggerley FDR             | Baggerley FDR | Baggerley FDR         | Baggerley FDR |       |
| Sobic.001G035001   | 1.690                    | 0.059         | 1.555                 | 0.003         | Perrn.001G034001   | 1.000                    | 1.000         | 1.000                 | 1.000         | 1.000                     | 1.000         | 1.000                 | 1.000         |       |
| Sobic.001G037001   | 10000.000                | 0.024         | 1.348                 | 1.000         | Perrn.001G036001   | 1.252                    | 0.755         | 2.024                 | 0.001         | -1.201                    | 1.000         | 1.347                 | 0.391         |       |
| Sobic.001G038001   | 3.308                    | 0.000         | -1.116                | 0.105         | Perrn.001G048001   | 2.417                    | 0.000         | -1.183                | 0.931         | 1.293                     | 0.922         | -2.211                | 0.000         |       |
| Sobic.001G039001   | -1.368                   | 0.000         | -1.368                | 0.000         | Perrn.001G049001   | -2.866                   | -1.386        | 0.569                 | 0.000         | -1.658                    | 0.563         | -1.513                | 0.000         |       |
| Sobic.001G039802   | 2.296                    | 0.000         | -1.323                | 0.000         | Perrn.001G050001   | 3.853                    | 0.489         | -29.170               | 0.633         | 16.658                    | 0.584         | -4.208                | 0.317         |       |
| Sobic.001G042001   | 13.460                   | 0.000         | 1.137                 | 1.000         | Perrn.001G056001   | -2.082                   | 0.584         | 2.034                 | 0.392         | 1.246                     | 1.000         | 5.277                 | 0.018         |       |
| Sobic.001G048001   | 26.610                   | 0.051         | 1.172                 | 1.000         | Perrn.001G069001   | -4.005                   | 0.000         | 1.165                 | 1.000         | -1.571                    | 0.892         | 2.970                 | 0.000         |       |
| Sobic.001G049001   | 10000.000                | 0.016         | 1.132                 | 0.000         | Perrn.001G070001   | 4.040                    | 0.000         | 22.663                | 0.000         | -2.246                    | 1.000         | 1.986                 | 0.000         |       |
| Sobic.001G050901   | 1.237                    | 0.000         | 1.204                 | 1.000         | Perrn.001G075001   | 2.899                    | 0.000         | 1.000                 | 0.281         | -1.084                    | 1.000         | 1.906                 | 0.524         |       |
| Sobic.001G057001   | 1.000                    | 1.000         | 1.000                 | 1.000         | Perrn.001G080001   | 1.000                    | 1.000         | 1.000                 | 1.000         | 1.000                     | 1.000         | 1.000                 | 1.000         |       |
| Sobic.001G068002   | 7.208                    | 0.382         | 6.646                 | 0.531         | Perrn.001G1104001  | -10000.000               | 0.111         | 4.824                 | 0.657         | -2.647                    | 0.864         | 10000.000             | 0.351         |       |
| Sobic.001G069001   | 3.474                    | 0.000         | 1.203                 | 0.000         | Perrn.001G111001   | -2.227                   | -0.150        | -1.158                | 0.000         | -1.165                    | 0.743         | 1.293                 | 0.000         |       |
| Sobic.001G069501   | 1.629                    | 0.000         | -1.467                | 0.000         | Perrn.001G1138001  | 1.245                    | 0.507         | 0.939                 | 0.000         | -1.679                    | 0.000         | -0.713                | 0.138         |       |
| Sobic.001G070901   | -2.045                   | 0.004         | 1.136                 | 0.870         | Perrn.001G1148001  | 1.000                    | 1.000         | 1.000                 | 1.000         | 1.000                     | 1.000         | 1.000                 | 1.000         |       |
| Sobic.001G116001   | 1.000                    | 1.000         | 1.000                 | 1.000         | Perrn.001G1308001  | -1.072                   | 0.885         | 3.007                 | 0.000         | -1.244                    | 0.942         | 2.591                 | 0.000         |       |
| Sobic.001G130001   | 0.782                    | 0.782         | -1.203                | 0.000         | Perrn.001G131001   | -4.260                   | 0.000         | -1.007                | 1.000         | -1.167                    | 1.000         | 5.594                 | 0.038         |       |
| Sobic.001G130801   | -2.146                   | 0.000         | 1.283                 | 0.000         | Perrn.001G142001   | 0.015                    | 0.015         | 0.323                 | 0.147         | -0.323                    | 0.147         | 1.854                 | 0.000         |       |
| Sobic.001G128002   | 14.855                   | 0.000         | -1.341                | 0.959         | Perrn.001G157001   | -37.036                  | 0.000         | -0.931                | 0.004         | 1.270                     | 0.895         | 7.929                 | 0.000         |       |
| Sobic.001G149001   | 10000.000                | 0.000         | 1.368                 | 1.000         | Perrn.001G168001   | 5.773                    | 0.040         | 4.623                 | 0.000         | -1.152                    | 1.000         | -1.438                | 0.597         |       |
| Sobic.001G149801   | 1.180                    | 0.000         | -1.341                | 1.000         | Perrn.001G174001   | 1.403                    | 0.000         | 1.045                 | 0.000         | -0.815                    | 0.959         | 4.311                 | 0.000         |       |
| Sobic.001G153001   | 18.823                   | 0.000         | 1.199                 | 0.000         | Perrn.001G183001   | 1.000                    | 1.000         | 1.022                 | 0.000         | -1.221                    | 0.928         | 1.348                 | 0.389         |       |
| Sobic.001G1538002  | 1.000                    | 0.709         | 1.348                 | 1.000         | Perrn.001G1857001  | -4.248                   | 0.002         | -2.655                | 0.344         | -1.019                    | 1.000         | 1.571                 | 0.099         |       |
| Sobic.001G1637001  | 13.756                   | 0.000         | 1.208                 | 1.000         | Perrn.001G1867001  | 1.405                    | 0.000         | -1.560                | 0.771         | -1.313                    | 0.942         | 1.663                 | 0.383         |       |
| Sobic.001G184001   | 0.230                    | 0.013         | -1.207                | 1.000         | Perrn.001G187001   | 1.245                    | 0.000         | 1.803                 | 0.527         | 1.059                     | 1.000         | 1.000                 | 1.000         |       |
| Sobic.001G184101   | -1.094                   | 1.000         | -2.157                | 1.000         | Perrn.001G192001   | -10000.000               | 0.145         | 1.000                 | 0.000         | -1.184                    | 1.000         | 10000.000             | 0.358         |       |
| Sobic.001G1934001  | -1.817                   | 0.403         | -1.306                | 1.000         | Perrn.001G2173001  | 34.290                   | 0.005         | 10000.000             | 0.318         | -10000.000                | 0.563         | -2.844                | 0.170         |       |
| Sobic.001G1973001  | 1.719                    | 0.118         | -1.923                | 0.196         | Perrn.001G2174001  | 18.189                   | 0.000         | 10000.000             | 0.161         | -10000.000                | 0.775         | -3.582                | 0.000         |       |
| Sobic.001G198001   | -2.923                   | 0.000         | -2.923                | 0.000         | Perrn.001G2253001  | -1.099                   | 0.000         | -1.106                | 1.000         | -1.429                    | 0.413         | 7.655                 | 0.000         |       |
| Sobic.001G2058001  | -10000.000               | 0.502         | 1.000                 | 1.000         | Perrn.001G2241001  | 0.571                    | 0.741         | 1.130                 | 0.761         | -1.240                    | 1.000         | -1.268                | 0.803         |       |
| Sobic.001G2175001  | -2.227                   | 0.013         | 1.260                 | 0.650         | Perrn.001G2460001  | -10000.000               | 0.489         | -10000.000            | 0.657         | -6.349                    | 0.925         | 1.000                 | 1.000         |       |
| Sobic.001G2189001  | 1.000                    | 1.000         | 1.000                 | 1.000         | Perrn.001G248001   | -10000.000               | 0.134         | 72.804                | 0.225         | 10000.000                 | 0.322         | 3.877                 | 0.329         |       |
| Sobic.001G219102   | 1.236                    | 0.000         | 1.236                 | 0.000         | Perrn.001G249001   | 1.000                    | 1.000         | 1.000                 | 1.000         | 1.000                     | 1.000         | 1.000                 | 1.000         |       |
| Sobic.001G223001   | 14.566                   | 0.000         | 1.366                 | 1.000         | Perrn.001G258001   | 1.000                    | 1.000         | 1.000                 | 1.000         | 1.000                     | 1.000         | 1.000                 | 1.000         |       |
| Sobic.001G234002   | 1.548                    | 0.205         | 1.324                 | 0.962         | Perrn.001G262001   | 1.800                    | 0.269         | 3.080                 | 0.000         | -0.945                    | 1.000         | 1.637                 | 0.120         |       |
| Sobic.001G234001   | 6.590                    | 0.000         | -1.614                | 0.000         | Perrn.001G273001   | 1.075                    | 0.000         | 4.125                 | 0.000         | -1.170                    | 1.000         | 1.146                 | 0.880         |       |
| Sobic.001G2349001  | 13.438                   | 0.000         | -2.038                | 0.517         | Perrn.001G2835001  | 1.307                    | 0.396         | 12.196                | 0.000         | -1.271                    | 1.000         | 5.129                 | 0.000         |       |
| Sobic.001G245002   | 1.000                    | 1.000         | 1.000                 | 1.000         | Perrn.001G3176001  | 1.210                    | 1.544         | 0.800                 | 0.683         | -1.336                    | 0.958         | 1.728                 | 0.120         |       |
| Sobic.001G252001   | 5.164                    | 0.003         | -1.063                | 1.000         | Perrn.001G3185001  | -10000.000               | 0.088         | -2.129                | 1.000         | -2.240                    | 0.922         | 10000.000             | 0.524         |       |
| Sobic.001G254001   | -1.370                   | 0.031         | -1.193                | 1.000         | Perrn.001G326001   | 137.166                  | 0.075         | 55.289                | 0.205         | 2.546                     | 0.947         | 1.026                 | 1.000         |       |
| Sobic.001G254101   | 2.164                    | 0.000         | 1.234                 | 0.000         | Perrn.001G343001   | 1.000                    | 1.000         | 1.000                 | 1.000         | 1.000                     | 1.000         | 1.000                 | 1.000         |       |
| Sobic.001G257002   | 16.885                   | 0.000         | 1.530                 | 0.959         | Perrn.001G348001   | 1.681                    | 0.000         | 1.063                 | 1.000         | 1.197                     | 1.000         | -1.322                | 0.148         |       |
| Sobic.001G2758001  | 1.000                    | 1.000         | 10000.000             | 0.959         | Perrn.001G349001   | -3.508                   | 0.000         | 1.303                 | 0.822         | -1.577                    | 0.582         | 4.499                 | 0.004         |       |
| Sobic.001G276001   | 1.548                    | 0.514         | -1.216                | 0.910         | Perrn.001G350001   | 1.000                    | 1.000         | 1.000                 | 1.000         | 1.000                     | 1.000         | 1.000                 | 1.000         |       |
| Sobic.001G284001   | 1.000                    | 1.000         | 1.000                 | 1.000         | Perrn.001G3505001  | -0.400                   | 0.000         | -0.400                | 0.000         | -1.871                    | 0.848         | 1.748                 | 0.000         |       |
| Sobic.001G284601   | 8.292                    | 0.031         | -1.015                | 1.000         | Perrn.001G3509001  | -3.279                   | 0.000         | -0.974                | 0.959         | -1.263                    | 0.430         | 1.531                 | 0.000         |       |
| Sobic.001G287001   | -1.719                   | 0.598         | -10000.000            | 0.658         | Perrn.001G35092001 | -0.729                   | 0.215         | -0.804                | 0.000         | 1.634                     | 0.746         | -1.084                | 1.000         |       |
| Sobic.001G289001   | 5.095                    | 0.000         | 1.394                 | 0.289         | Perrn.001G35098001 | -2.729                   | 0.025         | -0.100                | 0.000         | 2.438                     | 0.000         | 1.780                 | 0.523         |       |
| Sobic.001G289101   | 0.138                    | 0.335         | 1.060                 | 1.000         | Perrn.001G351001   | 1.317                    | 0.000         | -2.173                | 0.000         | -1.573                    | 0.728         | 1.588                 | 0.000         |       |
| Sobic.001G292001   | 2.456                    | 0.000         | 1.025                 | 1.000         | Perrn.001G3545001  | -14.342                  | 0.000         | -28.122               | 0.092         | -1.307                    | 1.000         | -1.500                | 0.504         |       |
| Sobic.001G2927001  | 1.000                    | 1.000         | 1.000                 | 1.000         | Perrn.001G355001   | 1.000                    | 1.000         | 1.000                 | 1.000         | 1.000                     | 1.000         | 1.000                 | 1.000         |       |
| Sobic.001G2958001  | 10000.000                | 0.018         | -1.864                | 0.959         | Perrn.001G3551001  | -2.838                   | 0.000         | 1.589                 | 0.534         | -1.762                    | 0.446         | 2.559                 | 0.001         |       |
| Sobic.001G296002   | -1.136                   | 0.097         | -1.141                | 0.959         | Perrn.001G3560001  | 0.011                    | 0.067         | 230.667               | 0.000         | -1.646                    | 0.000         | 1.407                 | 0.000         |       |
| Sobic.001G296001   | 1.000                    | 1.000         | 1.000                 | 1.000         | Perrn.001G3567001  | 8.997                    | 0.036         | 25.677                | 0.394         | -3.899                    | 0.732         | -1.366                | 0.910         |       |
| Sobic.001G3046001  | 8.292                    | 0.031         | -1.015                | 1.000         | Perrn.001G3568001  | -10000.000               | 0.463         | 10000.000             | 0.006         | -10000.000                | 0.854         | 10000.000             | 0.602         |       |
| Sobic.001G3047001  | -1.719                   | 0.598         | -10000.000            | 0.658         | Perrn.001G35682001 | 1.000                    | 1.000         | -10000.000            | 0.657         | 10000.000                 | 0.854         | 1.000                 | 1.000         |       |
| Sobic.001G3048001  | 5.095                    | 0.000         | 1.394                 | 0.289         | Perrn.001G35683001 | 1.386                    | 0.817         | 0.000                 | 0.000         | -1.286                    | 0.928         | 1.000                 | 1.000         |       |
| Sobic.001G3049001  | 2.456                    | 0.000         | 1.025                 | 1.000         | Perrn.001G3569001  | -17.303                  | 0.000         | -2.724                | 0.317         | 1.195                     | 1.000         | 7.593                 | 0.008         |       |
| Sobic.001G3049101  | 1.000                    | 1.000         | 1.000                 | 1.000         | Perrn.001G35695001 | -7.453                   | 0.000         | -1.585                | 0.334         | 1.762                     | 0.854         | 3.664                 | 0.000         |       |
| Sobic.001G30495002 | -1.230                   | 0.000         | -1.248                | 0.000         | Perrn.001G35698001 | -3.404                   | 0.000         | 1.382                 | 0.585         | -1.340                    | 0.854         | 2.248                 | 0.000         |       |
| Sobic.001G30495001 | 1.000                    | 1.000         | 1.000                 | 1.000         | Perrn.001G3570001  | 1.386                    | 0.000         | 1.336                 | 0.585         | -1.340                    | 0.854         | 2.248                 | 0.000         |       |
| Sobic.001G30495001 | -1.650                   | 0.002         | -1.263                | 0.959         | Perrn.001G35705001 | 1.681                    | 0.000         | 1.063                 | 1.000         | 1.197                     | 1.000         | -1.322                | 0.148         |       |
| Sobic.001G30495001 | -1.165                   | 0.127         | -1.151                | 0.959         | Perrn.001G358001   | -3.508                   | 0.000         | 1.303                 | 0.822         | -1.577                    | 0.582         | 4.499                 | 0.004         |       |
| Sobic.001G30495001 | 1.180                    | 0.384         | 1.000                 | 1.000         | Perrn.001G3585001  | 1.000                    | 1.000         | 1.000                 | 1.000         | 1.000                     | 1.000         | 1.000                 | 1.000         |       |
| Sobic.001G30495001 | -1.165                   | 0.127         | -1.151                | 0.959         | Perrn.001G35855001 | -0.400                   | 0.000         | -0.400                | 0.000         | -1.871                    | 0.848         | 1.748                 | 0.000         |       |
| Sobic.001G30495001 | 1.371                    | 0.427         | 1.376                 | 1.000         | Perrn.001G35859001 | -2.732                   | 0.053         | -4.111                | 0.398         | -1.769                    | 0.498         | 1.748                 | 0.083         |       |
| Sobic.001G30495001 | 1.999                    | 0.002         | -1.142                | 1.000         | Perrn.001G3766001  | -10000.000               | 0.141         | 1.000                 | 1.000         | -10000.000                | 0.494         | 1.000                 | 1.000         |       |
| Sobic.001G3136001  | 3.897                    | 0.202         | 2.227                 | 0.959         | Perrn.001G3766001  | 1.012                    | 0.020         | 19.265                | 0.000         | -1.145                    | 1.000         | 1.528                 | 0.488         |       |
| Sobic.001G3137001  | 0.011                    | 0.008         | 0.011                 | 0.008         | Perrn.001G3766001  | -0.400                   | 0.000         | -0.400                | 0.000         | -1.871                    | 0.848         | 1.748                 | 0.000         |       |
| Sobic.001G3137001  | -5.090                   | 0.395         | -2.136                | 1.000         | Perrn.001G3766001  | -2.512                   | 0.000         | -3.389                | 0.434         | 1.005                     | 1.000         | 1.819                 | 0.000         |       |
| Sobic.001G3137001  | 1.066                    | 1.000         | -1.647                | 0.531         | Perrn.001G3766001  | -10000.000               | 0.121         | -10000.000            | 0.657         | -1.796                    | 1.000         | 1.000                 | 1.000         |       |
| Sobic.001G3199003  | 8.283                    | 0.000         | -1.072                | 1.000         | Perrn.001G3766001  | -2.617                   | 0.000         | 1.132                 | 1.000         | -1.118                    | 1.000         | 2.649                 | 0.000         |       |
| Sobic.001G3199003  | -2.923                   | 0.000         | -2.923                | 0.000         | Perrn.001G3766001  | -2.227                   | 0.108         | -0.657                | -1.589        | 0.000                     | -2.268        | 0.728                 | 1.268         | 0.000 |
| Sobic.001G3199003  | -1.802                   | 0.            |                       |               |                    |                          |               |                       |               |                           |               |                       |               |       |
