# Supplementary material for: Imbalanced Regulation of Fungal Nutrient Transports According to Phosphate Availability in a Symbiocosm Formed by Poplar, Sorghum, and Rhizophagus irregularis
Source: Front Plant Sci. 2019 Dec 12;10:1617. doi: 10.3389/fpls.2019.01617 (PMC6920215; doi:10.3389/fpls.2019.01617)
Supplement: Table S7 — Relative abundances of metabolites detected poplar roots. Abundances were measured in the mycorrhized (+AM) and non-mycorrhized (-AM) poplar roots under high (hP) and low (lP) P availability. Data was log transformed and tested by y 2-way analysis of variance (ANOVA) (p<0.05) in MeV v4.9 (http://www.tm4.org/mev.html). Significant p-values are highlighted in bold. [file Table_7.xlsx]

## Sheet: Poplar
Table S7 Relative abundances of metabolites detected poplar roots. Abundances were measured in the mycorrhized (+AM) and non-mycorrhized (-AM) poplar roots under high (hP) and low (lP) P availability. Data was log transformed and tested by y 2-way analysis of variance ( ANOVA) (p<0.05) in MeV v4.9 (http://www.tm4.org/mev.html). Significant p-values are highlighted in bold.
Class	Name	Average abundance of metabolites in poplar				Standard deviation				log2 ratios					2-way ANOVA
		lP +AM	hP +AM	lP -AM	hP -AM	lP +AM	hP +AM	lP -AM	hP -AM	lP+AM vs hP+AM	lP-AM vs hP -AM	log2ratio lP vs lP ctr	hP +AM vs hP-AM	+AM vs -AM	Effect of mycorrhization	Effect of p-availability	Effect of interaction
Acids	Aconitic acid, cis-	0.00108892	0.00110017	0.00317049	0.00356004	0.000195916	0.000492007	0.000838028	0.00196547	-0.0148207	-0.16719	-1.5418	-1.69417	-1.62039	0.00608321	0.863223	0.934032
Acids	Benzoic acid	0.00911998	0.0103303	0.0186863	0.0113242	0.00142277	0.000945116	0.00470628	0.00211063	-0.179781	0.722567	-1.03488	-0.132527	-0.625675	0.0126766	0.181889	0.0343936
Acids	Benzoic acid, 3,4-dihydroxy-	0.0165546	0.0176545	0.0198991	0.0182453	0.00653234	0.00500565	0.00420166	0.0093005	-0.0928019	0.125179	-0.265474	-0.0474938	-0.157095	0.750251	0.83913	0.60221
Acids	Benzoic acid, 4-hydroxy-	0.0173617	0.018655	0.0216375	0.0121303	0.00785299	0.00307271	0.0031969	0.00491488	-0.103656	0.834916	-0.317622	0.62095	0.0930217	0.767188	0.426433	0.162207
Acids	Citric acid	0.025896	0.0248243	0.0225683	0.0144078	0.00351394	0.00228617	0.00183854	0.0070811	0.0609765	0.647454	0.198431	0.784909	0.455972	0.0536519	0.124867	0.171898
Acids	Fumaric acid	0.0109179	0.0091832	0.0205932	0.0162286	0.00372339	0.00330987	0.00282942	0.00741887	0.249631	0.343631	-0.915466	-0.821467	-0.873281	0.0383847	0.325136	0.814242
Acids	Glutaric acid, 2-hydroxy-	0.00530391	0.00643396	0.0212462	0.0141738	0.00174933	0.00390618	0.00368699	0.0039141	-0.278651	0.58398	-2.00207	-1.13944	-1.59339	0.00328149	0.546241	0.42038
Acids	Glutaric acid, 2-oxo-	0.00421647	0.00373378	0.0195688	0.00628314	0.00207223	0.00195154	0.00493716	0.0013053	0.175399	1.639	-2.21445	-0.750849	-1.7012	0.00923708	0.110784	0.179835
Acids	Glutaric acid, 3-hydroxy-3-methyl-	0.00822327	0.0106146	0.0218389	0.0125051	0.00365808	0.00479229	0.00323367	0.00511512	-0.368269	0.804388	-1.40912	-0.236459	-0.866418	0.0646754	0.548523	0.199
Acids	Isocitric acid	0.0243092	0.021397	0.019836	0.0109197	0.00584246	0.0043054	0.00192442	0.00584841	0.184092	0.861183	0.293382	0.970472	0.571536	0.0540119	0.0839091	0.190439
Acids	Lactic acid	0.00540033	0.0086738	0.0169329	0.00661865	0.00206388	0.00212913	0.00603634	0.00166592	-0.683618	1.35522	-1.64871	0.390128	-0.742775	0.0828423	0.388961	0.0127504
Acids	Malic acid	0.0161914	0.0187011	0.0206502	0.012555	0.00562867	0.00702494	0.00150515	0.00136916	-0.207894	0.717891	-0.350929	0.574856	0.0715054	0.95826	0.412284	0.135289
Acids	Malic acid, 2-isopropyl-	ND	ND	0.0183109	0.00890409	ND	ND	0.00497162	0.00093124	ND	1.04016	ND	ND	ND	ND	ND	ND
Acids	Malic acid, 2-methyl-	ND	ND	0.0212207	0.0117861	ND	ND	0.00377535	0.0020865	ND	0.848379	ND	ND	ND	ND	ND	ND
Acids	Pyruvic acid	0.0212825	0.0205906	0.018573	0.0151984	0.00459166	0.00207115	0.00175506	0.00409155	0.0476835	0.28929	0.196457	0.438064	0.310219	0.146827	0.400471	0.45386
Acids	Quinic acid	0.00271344	0.0046874	0.00536308	0.00283913	0.00100699	0.00125478	0.00191993	0.0018341	-0.788662	0.917611	-0.982938	0.723335	-0.148325	0.894505	0.72305	0.0921054
Acids	Shikimic acid	0.00192228	0.00319354	0.0163036	0.00925014	5.02e-05	0.000983965	0.00101591	0.00182883	-0.732337	0.817645	-3.0843	-1.53432	-2.3205	3.97708e-06	0.658263	0.00770189
Acids	Succinic acid	0.00831549	0.00808953	0.0183787	0.0111417	0.00239923	0.0050472	0.00265988	0.00182893	0.0397453	0.722063	-1.14416	-0.461842	-0.847574	0.0317405	0.211634	0.551959
Acids	Vanillic acid	0.0154259	0.0136453	0.0208606	0.0146139	0.00479536	0.00492893	0.00322248	0.00401707	0.176955	0.513445	-0.435423	-0.0989334	-0.287189	0.352963	0.258361	0.631322
Alcohols	Benzylalcohol	0.00914992	0.00974433	0.0160405	0.00829512	0.00150582	0.00101401	0.00665914	0.00278377	-0.0908036	0.951383	-0.809886	0.232301	-0.365121	0.479105	0.180494	0.103743
Aliphatic	Heneicosane, n-	0.0134941	0.0148496	0.0130131	0.011708	0.00295221	0.00096557	0.00136906	0.00435132	-0.138104	0.152474	0.0523577	0.342936	0.197285	0.371503	0.855053	0.419322
Aliphatic	Tetracosane, n-	0.000787517	0.000888164	0.000641712	0.000563466	0.000134271	0.000176553	0.000130393	0.000254308	-0.173516	0.187598	0.295385	0.656499	0.475502	0.139712	0.778317	0.470614
Aliphatic	Triacontane, n-	0.00136541	0.00135194	0.000942134	0.00100876	0.000303469	0.000197294	0.000131214	0.000369508	0.0143049	-0.098575	0.535327	0.422447	0.478063	0.0976053	0.985251	0.967973
Amino Acids	Aspartic acid	0.000864568	0.000489059	0.0186224	0.0123991	0.000368329	0.000154567	0.00606981	0.00411219	0.821969	0.586801	-4.42892	-4.66409	-4.51837	2.69768e-06	0.134231	0.845135
Amino Acids	Butanoic acid, 4-amino-	0.000927913	0.000578866	0.00722615	0.00507327	0.000137967	0.000137244	0.00234112	0.000486745	0.680761	0.510311	-2.96117	-3.13162	-3.02905	7.99072e-07	0.031526	0.572377
Amino Acids	Glutamic acid	0.00248029	0.00102536	0.00915691	0.0165399	0.00130049	0.000607561	0.00163941	0.00417744	1.27438	-0.85302	-1.88435	-4.01176	-2.87384	0.000718599	0.574433	0.090465
Amino Acids	Glycine	0.00552001	0.00407623	0.0109896	0.00710652	0.00145052	0.00127443	0.00268627	0.00233367	0.437434	0.628927	-0.993399	-0.801906	-0.915141	0.0229931	0.112249	0.73551
Amino Acids	Isoleucine	0.00517537	0.00363466	0.0181753	0.011526	0.00127844	0.00114785	0.00488548	0.000895016	0.509844	0.657085	-1.81224	-1.665	-1.75331	7.04882e-05	0.0412224	0.873284
Amino Acids	Leucine	0.0069478	0.00725186	0.0188119	0.0148806	0.00127678	0.000733557	0.00303113	0.00565637	-0.0617951	0.338217	-1.43702	-1.03701	-1.24657	0.000762874	0.483163	0.305747
Amino Acids	Phenylalanine	0.00165732	0.000981547	0.018899	0.0120069	0.000502689	3.64098e-05	0.00451925	0.0026413	0.755724	0.654446	-3.51138	-3.61266	-3.54989	3.93883e-06	0.0480016	0.963772
Amino Acids	Pyroglutamic acid	0.00582056	0.00493331	0.0144491	0.0149185	0.000679165	0.00112099	0.00214621	0.00722788	0.238603	-0.0461261	-1.31175	-1.59648	-1.44937	0.000903321	0.531672	0.761594
Amino Acids	Serine	0.00787466	0.00575536	0.0173941	0.0116428	0.0013015	0.000702466	0.00417978	0.000623071	0.452312	0.579153	-1.14331	-1.01646	-1.0911	0.000141073	0.0144106	0.765303
Amino Acids	Valine	0.002822	0.00301257	0.0184074	0.010724	0.000704935	0.000630881	0.00555533	0.000470975	-0.0942755	0.779442	-2.70549	-1.83178	-2.31988	9.85662e-06	0.224426	0.117765
Aromatic	Catechol	0.00391552	0.00145597	0.0105533	0.0029196	0.00422332	0.000490971	0.01046	0.00183407	1.42722	1.85386	-1.43042	-1.00379	-1.32667	0.244876	0.275546	0.597539
Fatty Acids	Dodecanoic acid	0.0114835	0.0123918	0.0110847	0.0105602	0.0024232	0.00296936	0.00291021	0.000904921	-0.109824	0.0699226	0.0510023	0.230749	0.141497	0.571117	0.879498	0.788559
Fatty Acids	Hexadecanoic acid	0.0178886	0.018814	0.0198351	0.0165268	0.0024282	0.00174229	0.00483826	0.00487125	-0.0727595	0.263253	-0.149016	0.186997	0.0134531	0.770346	0.6433	0.430924
Fatty Acids	Hexanoic acid	0.016867	0.0153032	0.0134826	0.0173636	0.00668556	0.00241836	0.00186587	0.00613704	0.140366	-0.364972	0.323106	-0.182232	0.0606328	0.811991	0.746361	0.621746
Fatty Acids	Octadecanoic acid	0.0171349	0.0166834	0.0172996	0.0138751	0.00321945	0.00265649	0.00592122	0.0035409	0.0385277	0.318242	-0.0137974	0.265917	0.117431	0.516482	0.538669	0.622321
N- Compounds	Ethanolamine	0.0156681	0.0175529	0.0171352	0.0173413	0.0014355	0.000751257	0.00250864	0.00531855	-0.16388	-0.0172501	-0.129131	0.0174998	-0.0535155	0.92686	0.722234	0.594011
N- Compounds	Phenol, 2-amino-	0.00554952	0.00465025	0.0160469	0.0087654	0.00258766	0.000700421	0.00419522	0.00355128	0.255055	0.872402	-1.53186	-0.914512	-1.28252	0.0191227	0.241615	0.305561
N- Compounds	Putrescine	0.0232151	0.0228309	0.0215711	0.018884	0.00330746	0.00439511	0.00115328	0.005288	0.0240755	0.191934	0.105966	0.273824	0.186756	0.362175	0.499345	0.615914
N- Compounds	Pyridine, 2-hydroxy-	0.0169654	0.0213149	0.0226197	0.017921	0.00402662	0.00396989	0.00111204	0.00619686	-0.329269	0.335929	-0.414987	0.25021	-0.0827708	0.803397	0.8722	0.160575
Phenylpropanoids	Caffeic acid, cis-	0.0164957	0.0161807	0.0191415	0.0102158	0.00310548	0.00159725	0.00177316	0.0041412	0.0278157	0.905904	-0.214613	0.663475	0.154531	0.297627	0.069933	0.0747604
Phenylpropanoids	Caffeic acid, trans-	0.0146739	0.0141201	0.0204905	0.00929536	0.00298284	0.00206748	0.00229345	0.00433776	0.055506	1.14037	-0.481702	0.603166	-0.0488601	0.665783	0.0555911	0.0696972
Phenylpropanoids	Cinnamic acid, 4-hydroxy-, trans-	ND	ND	0.0117609	0.00777979	ND	ND	0.00047165	0.00290502	ND	0.596195	ND	-0.467477	ND	ND	ND	ND
Phenylpropanoids	Epicatechin	0.0142925	0.0159636	0.0201529	0.0132939	0.00285249	0.00370613	0.00267877	0.00439215	-0.159527	0.600223	-0.495726	0.264024	-0.144639	0.668102	0.323476	0.138099
Phenylpropanoids	Ferulic acid, trans-	0.0152936	0.0142545	0.021113	0.0110167	0.00397755	0.0040027	0.000410279	0.00124834	0.101512	0.938435	-0.465201	0.371722	-0.120842	0.703105	0.0657771	0.121438
Phenylpropanoids	Quinic acid, 3-caffeoyl-, cis-	0.0176364	0.0157614	0.0085124	0.00808954	0.00940643	0.00244766	0.0027181	0.00706608	0.162159	0.0735073	1.05091	0.962262	1.0084	0.101715	0.745225	0.572322
Phenylpropanoids	Quinic acid, 3-caffeoyl-, trans-	0.0160228	0.0145989	0.0100308	0.00749981	0.00906493	0.0022614	0.00140466	0.00698581	0.134268	0.419509	0.675689	0.960931	0.804676	0.15507	0.487309	0.346958
Phosphates	Fructose-6-phosphate	0.00394967	0.00562146	0.0159583	0.0186161	0.000520136	0.00188578	0.00510544	0.00601342	-0.509212	-0.222246	-2.0145	-1.72753	-1.85294	0.00325488	0.420358	0.806155
Phosphates	Glucose-6-phosphate	0.00214576	0.00459879	0.0133889	0.0180141	0.000636396	0.00165748	0.00483571	0.00459803	-1.09976	-0.428089	-2.64147	-1.9698	-2.21911	0.00025364	0.0652091	0.452793
Phosphates	myo-Inositol-phosphate	ND	ND	0.0012415	0.00268188	ND	ND	6.24028e-05	0.00187099	ND	-1.11116	-1.16665	ND	ND	ND	ND	ND
Phosphates	Phosphoric acid	0.000647001	0.000473884	0.00151056	0.0109915	0.000364982	2.20281e-05	9.55572e-05	0.0140485	0.449234	-2.86322	-1.22325	-4.53571	-3.47945	0.0416866	0.633915	0.467655
Phosphates	Phosphoric acid monomethyl ester	0.00285429	0.00372946	0.0165201	0.017096	0.000968632	0.0012536	0.00698399	0.00924157	-0.385835	-0.0494357	-2.53302	-2.19662	-2.35217	0.000854185	0.647561	0.675854
Polyhydroxy Acids	Arabinonic acid-1,4-lactone	0.0131154	0.00921646	0.0188522	0.0063625	0.000906214	0.0019465	0.00460777	0.00123761	0.508977	1.56707	-0.523473	0.53462	-0.175163	0.914389	0.00135015	0.0408933
Polyhydroxy Acids	Galactaric acid	0.00626273	0.00743736	0.0197669	0.0112561	0.00225279	0.00311267	0.00509398	0.00246933	-0.248	0.812381	-1.65822	-0.59784	-1.17915	0.0109076	0.454709	0.208635
Polyhydroxy Acids	Galactonic acid	0.00394057	0.00610579	0.0166705	0.0107259	0.00166233	0.00255549	0.00106496	0.00198392	-0.631774	0.636197	-2.08082	-0.812848	-1.44731	0.00245536	0.963195	0.0999966
Polyhydroxy Acids	Gluconic acid	0.00205034	0.00238694	0.00682105	0.00292632	0.000824548	0.00146941	0.00110675	0.000449363	-0.219301	1.2209	-1.73413	-0.293926	-1.13534	0.0184881	0.217287	0.138915
Polyhydroxy Acids	Glyceric acid	0.00554778	0.00675733	0.0202571	0.0176313	0.00100772	0.000665509	0.00213681	0.00478206	-0.284543	0.200286	-1.86844	-1.38361	-1.6225	0.000134237	0.900384	0.238166
Polyhydroxy Acids	Gulonic acid	0.0135377	0.0131742	0.0206933	0.0134751	0.00154238	0.00186449	0.00328739	0.00560797	0.0392695	0.618868	-0.612182	-0.0325834	-0.355182	0.424889	0.2572	0.310516
Polyhydroxy Acids	Lyxonic acid-1,4-lactone	0.0145387	0.0117952	0.0185258	0.00984491	0.000790823	0.0022293	0.00481575	0.00602043	0.3017	0.91209	-0.349641	0.260749	-0.107484	0.771807	0.0796654	0.29222
Polyhydroxy Acids	Ribonic acid	0.00870734	0.00650739	0.0198295	0.013925	0.00187271	0.00012541	0.00307728	0.00410931	0.420153	0.509969	-1.18735	-1.09753	-1.14961	0.000554081	0.0477717	0.685843
Polyhydroxy Acids	Saccharic acid	0.00424314	0.00420512	0.0208538	0.00805654	0.00160719	0.000794507	0.00398291	0.00165184	0.012987	1.37208	-2.29711	-0.938013	-1.77486	0.000531367	0.0650396	0.0392288
Polyhydroxy Acids	Threonic acid	0.00403955	0.0028561	0.0190865	0.00921068	0.000637232	0.000665421	0.00271689	0.00350691	0.500146	1.05118	-2.24029	-1.68926	-2.0369	0.000175813	0.019451	0.29206
Polyols	Arabitol	0.000811285	0.00093077	0.00217076	0.00181715	0.000170694	0.000355432	0.000229021	0.000685079	-0.198216	0.256522	-1.41992	-0.965178	-1.19484	0.00400465	0.722139	0.470572
Polyols	Galactitol	0.0165378	0.0113444	0.0131282	0.0180064	0.00509742	0.00246483	0.0012007	0.00538806	0.543784	-0.455843	0.333105	-0.666521	-0.159167	0.506908	0.853065	0.143287
Polyols	Glycerol	0.00607508	0.0110238	0.00730595	0.0079283	0.000260613	0.00631124	0.00182904	0.00189579	-0.859645	-0.11794	-0.266169	0.475536	0.166582	0.927473	0.306865	0.474691
Polyols	Inositol, myo-	0.00316369	0.00160772	0.0186	0.0155692	0.00140237	0.000450594	0.00496235	0.00602823	0.976591	0.256607	-2.55562	-3.27561	-2.84021	2.88811e-05	0.122895	0.421779
Polyols	Mannitol	0.000973588	0.000811361	0.000744436	0.00135555	0.000348208	0.000392944	0.000183356	0.000880157	0.262967	-0.864657	0.387164	-0.74046	-0.234495	0.895945	0.894821	0.467718
Sugar Conjugates	Galactinol	0.0028753	0.00176567	0.0078438	0.0156097	0.000899457	0.000412405	0.00208313	0.0117028	0.703499	-0.992819	-1.44784	-3.14416	-2.33731	0.00988709	0.828594	0.391473
Sugar Conjugates	Salicin	0.00623433	0.00378042	0.0144011	0.00481157	0.00517145	0.000818823	0.00763335	0.00225015	0.72169	1.5816	-1.20787	-0.347961	-0.93993	0.193179	0.137212	0.274577
Sugar Conjugates	Salicylic acid-glucopyranoside	0.00156162	0.00163277	0.00557479	0.0122197	0.000250276	8.113e-05	0.000451411	0.0132241	-0.0642747	-1.13222	-1.83587	-2.90381	-2.47781	0.0378884	0.912927	0.997713
Sugars	Arabinose	0.00615811	0.00698499	0.0171978	0.0132235	0.00206983	0.00362235	0.00526912	0.00222389	-0.18177	0.379117	-1.48166	-0.920777	-1.21078	0.00780232	0.776115	0.574979
Sugars	Fructose	0.0175592	0.0142255	0.0101479	0.0101389	0.00877759	0.00747395	0.00551525	0.00639422	0.303745	0.00128174	0.791043	0.48858	0.647791	0.300406	0.769093	0.985809
Sugars	Galactose	0.0114218	0.0148182	0.0137163	0.00882602	0.00548961	0.0117907	0.00653769	0.00146368	-0.375576	0.636057	-0.264099	0.747533	0.219131	0.984402	0.812932	0.615389
Sugars	Glucose	0.0088622	0.00755328	0.00667396	0.00782733	0.00462264	0.00530342	0.0031566	0.00479092	0.230561	-0.229976	0.409122	-0.0514155	0.178876	0.727815	0.791027	0.940567
Sugars	Glucose, 1,6-anhydro-, beta-	0.00896373	0.00983386	0.0196061	0.0120399	0.00071216	0.00126597	0.00420054	0.000745019	-0.133658	0.703482	-1.12913	-0.29199	-0.751473	0.000809883	0.076091	0.017746
Sugars	Maltose	0.00433828	0.00338921	0.0127049	0.0070243	0.000762438	0.000776802	0.00682348	0.00186755	0.356173	0.854958	-1.55019	-1.0514	-1.35226	0.00615104	0.13877	0.621538
Sugars	Mannose	0.0077278	0.0124029	0.00963793	0.00987088	0.00301165	0.0109169	0.00446866	0.0040449	-0.682543	-0.0344552	-0.318665	0.329422	0.045269	0.800461	0.791291	0.86567
Sugars	Raffinose	0.00264601	0.00112877	0.000609213	0.0107528	0.000723939	0.000292382	0.000123474	0.01422	1.22907	-4.14162	2.1188	-3.2519	-1.58976	0.602311	0.766128	0.173063
Sugars	Rhamnose	0.00697991	0.00717126	0.0164564	0.0118058	0.0029014	0.00145118	0.00373977	0.000362469	-0.0390178	0.479157	-1.23737	-0.719192	-0.997949	0.00904124	0.674307	0.3508
Sugars	Ribose	0.00355941	0.00325069	0.0172319	0.00929808	0.00145618	0.000713495	0.00573711	0.00236044	0.130892	0.890076	-2.27537	-1.51619	-1.96188	0.000573272	0.25762	0.257609
Sugars	Sucrose	0.0234098	0.0236834	0.0227605	0.0211072	0.00188208	0.00370168	0.00205951	0.00697755	-0.0167676	0.108791	0.040581	0.16614	0.10236	0.534314	0.669075	0.657658
Sugars	Trehalose, alpha,alpha'-	0.00183335	0.00257381	0.000900696	0.00102367	0.000172388	0.00135576	0.000143091	0.000593219	-0.489425	-0.184643	1.02537	1.33015	1.19546	0.0461024	0.883113	0.840518
Sugars	Xylose	0.00706131	0.00765029	0.0136876	0.00711481	0.00335115	0.00355824	0.00704028	0.0039933	-0.11558	0.94397	-0.954861	0.104689	-0.499796	0.638776	0.525583	0.363407
Sugars	Xylulose	0.0011042	ND	0.00565253	0.00256801	ND	ND	0.00195749	0.00109245	ND	1.13825	-2.3559	ND	ND	ND	ND	ND
Unknown Metabolites
MSTs	Unknown#bth-pae-007	0.00517119	0.0049285	0.00299117	0.00317655	0.00223093	0.000395099	0.00053388	0.00122111	0.0693459	-0.0867502	0.789788	0.633692	0.711504	0.0562539	0.964356	0.917913
MSTs	A112003-101	0.0216537	0.0197068	0.0168536	0.0148473	0.0044292	0.00261123	0.00122089	0.00384576	0.135921	0.182856	0.361556	0.408491	0.383728	0.0840822	0.401518	0.77303
MSTs	Unknown#bth-pae-013	0.0158832	0.010715	0.0170738	0.0177353	0.00599651	0.00149866	0.00205802	0.00908197	0.567868	-0.0548377	-0.104287	-0.726993	-0.388138	0.284623	0.453927	0.640962
MSTs	Unknown#bth-pae-067	0.00165003	0.00255543	0.0196865	0.0160891	0.000639383	0.000282083	0.00482901	0.00579667	-0.631072	0.29112	-3.57664	-2.65445	-3.08864	2.39911e-05	0.591867	0.150085
MSTs	D118786	0.0238432	0.0275536	0.0215781	0.0196386	0.00435267	0.00198381	0.0020692	0.00588747	-0.208662	0.135877	0.144008	0.488547	0.318448	0.138193	0.96046	0.326545
MSTs	A124002-101	0.0235511	0.0153311	0.0184218	0.00739366	0.00698294	0.000756725	0.00225239	0.00281903	0.619331	1.31705	0.354381	1.0521	0.590876	0.0368916	0.00980254	0.168713
MSTs	A140003-101	ND	ND	0.0189706	0.011926	ND	ND	0.00318665	0.00169089	ND	0.669657	ND	ND	ND	ND	ND	ND
MSTs	A141003-101	ND	ND	0.0204041	0.0132791	ND	ND	0.00422143	0.00177343	ND	0.619702	-5.51332	ND	ND	ND	ND	ND
MSTs	Unknown#bth-pae-028	0.0105107	0.0107454	0.0108173	0.00765873	0.0015893	0.00191247	0.00273889	0.00210155	-0.0318572	0.498161	-0.0414723	0.488546	0.202229	0.29347	0.309258	0.26503
MSTs	A143003-101	0.0250826	0.0271993	0.0212967	0.0203026	0.00249391	0.00304369	0.00235486	0.00608785	-0.116887	0.068966	0.236055	0.421908	0.329753	0.109805	0.950769	0.547426
MSTs	A145005-101	0.0248476	0.0258768	0.0217941	0.0197733	0.00321333	0.00275006	0.00219086	0.00606035	-0.0585548	0.14039	0.189164	0.388109	0.287227	0.159435	0.719378	0.524348
MSTs	A145008-101	0.00851068	0.00543093	0.00468649	0.00489408	0.00323345	0.00170017	0.00216073	0.00169734	0.648075	-0.0625287	0.860765	0.150161	0.541213	0.198498	0.510994	0.340102
MSTs	NA145015	0.025003	0.027041	0.0216703	0.020221	0.00231468	0.00245417	0.00276127	0.00652704	-0.113045	0.099862	0.206386	0.419293	0.313082	0.135499	0.876721	0.515151
MSTs	A147001-101	0.0250285	0.0251809	0.0210985	0.0181016	0.00247524	0.0023636	0.00365842	0.00589975	-0.00875956	0.221026	0.24643	0.476216	0.357101	0.0948631	0.536189	0.509893
MSTs	A148010-101	0.00635222	0.00502328	0.0173058	0.0127693	0.00182764	0.00128714	0.00502335	0.0086715	0.338632	0.438575	-1.44592	-1.34598	-1.40264	0.0138894	0.241618	0.670795
MSTs	Unknown#bth-pae-039	ND	ND	0.0228225	0.0136361	ND	ND	0.00130521	0.00612217	ND	0.743022	ND	ND	ND	ND	ND	ND
MSTs	NA160001	0.000814224	0.00132246	0.0171344	0.0087109	6.89385e-05	0.000354689	0.000726245	0.00218027	-0.699723	0.976001	-4.39532	-2.7196	-3.59646	3.65339e-06	0.440594	0.00934141
MSTs	NA170001	0.00888018	0.0129527	0.0200325	0.00964503	0.0030767	0.00430963	0.00382476	0.000630004	-0.544591	1.05449	-1.17368	0.425394	-0.44287	0.1519	0.425921	0.0247519
MSTs	A175008-101	0.00151382	0.00277345	0.00868053	0.00700919	0.000693209	0	0.00267625	0.00468303	-0.873485	0.308535	-2.51959	-1.33756	-1.87169	NaN	NaN	NaN
MSTs	NA176001	0.0155552	0.0125862	0.0235121	0.0151502	0.00556641	0.00353255	0.00228128	0.00617471	0.305551	0.634071	-0.596005	-0.267485	-0.458229	0.203193	0.182487	0.491341
MSTs	similar to Fructose Derivate	0.0135858	0.017595	0.0205638	0.0103617	0.00868558	0.010917	0.00456743	0.00711049	-0.373072	0.988849	-0.598014	0.763908	0.0118593	0.824549	0.617699	0.297941
MSTs	similar to Fructose Derivate	0.00799543	0.0108091	0.0172189	0.0103157	0.00200537	0.000110151	0.00254842	0.00263154	-0.434999	0.73916	-1.10675	0.0674096	-0.550166	0.0946119	0.584107	0.0489453
MSTs	similar to Fructose Derivate	0.0143156	0.0171697	0.0112678	0.00565473	0.0100579	0.0115348	0.00264603	0.00362433	-0.262274	0.994676	0.345383	1.60233	0.895732	0.624966	0.714543	0.345413
MSTs	A186003-101	0.0105434	0.00872818	0.0173053	0.00370025	0.00197318	0.0033741	0.00648363	0.00114724	0.272582	2.22552	-0.714881	1.23806	-0.1243	0.409981	0.00544692	0.0253666
MSTs	A190021-101	0.00553888	0.00388584	0.00547201	0.00733417	0.0033346	0	0.00266409	0.00305041	0.511368	-0.422561	0.0175214	-0.916408	-0.44232	NaN	NaN	NaN
MSTs	A196004-101	0.00769964	0.00425669	0.00900053	0.0127314	0.00310915	0.000785029	0.00198282	0.00272611	0.855059	-0.500305	-0.225219	-1.58058	-0.862039	0.013926	0.720799	0.0771138
MSTs	NA201002	0.00280479	0.00274714	0.0209456	0.00647334	0.000168113	1.55028e-05	0.00403079	0.00204214	0.0299603	1.69407	-2.90069	-1.23658	-2.30411	0.000279983	0.0157004	0.0178476
MSTs	A203003-101	0.00881908	0.00602119	0.0111904	0.0113671	0.00287665	0.00111193	0.0025223	0.00443335	0.55058	-0.0226038	-0.343559	-0.916743	-0.604088	0.139814	0.464424	0.582918
MSTs	A203005-101	0.00555343	0.00269934	0.0116265	0.0102642	0.000736735	0	0.00252102	0.0104909	1.04077	0.179804	-1.06597	-1.92694	-1.40737	NaN	NaN	NaN
MSTs	A202007-101	0.00855032	0.00388632	0.00889614	0.0111707	0.00351575	0.00195849	0.00293358	0.00185699	1.13757	-0.328465	-0.0571997	-1.52324	-0.690213	0.0606522	0.389785	0.101468
MSTs	A204012-101	0.00842257	0.00606776	0.0219081	0.00685541	0.00271181	0.00171	0.00278124	0.00425004	0.473098	1.67615	-1.37913	-0.176079	-0.989148	0.0998207	0.0145747	0.0930202
MSTs	A206002-101	0.00424681	0.0035838	0.0182315	0.00880446	0.000907663	7.2416e-05	0.00578101	0.00270194	0.244888	1.05012	-2.10198	-1.29674	-1.78768	0.00018231	0.0367389	0.131625
MSTs	A207008-101	0.00225688	0.00305167	0.00304813	0.00207658	0.000188661	0.00035973	0.000906211	0.000542348	-0.43527	0.553714	-0.433591	0.555393	0.0508509	0.622458	0.791674	0.0484454
MSTs	NA211001	0.00602536	0.00778979	0.0183256	0.00662236	0.00270265	0.0018995	0.00580321	0.00314948	-0.370537	1.46844	-1.60474	0.234239	-0.85267	0.204687	0.290114	0.0560268
MSTs	A212001-101	0.0116818	0.00902261	0.015132	0.0184528	0.00484184	0.00415754	0.0015544	0.0094856	0.37264	-0.286235	-0.373347	-1.03222	-0.697874	0.157744	0.741161	0.631772
MSTs	NA213001	0.0116517	0.0116506	0.0102356	0.0138441	0.00609203	0.00507524	0.00453954	0.00207937	0.000127443	-0.435676	0.186942	-0.248862	-0.047344	0.811071	0.516483	0.624808
MSTs	A214003-101	0.00894357	0.0113403	0.0162593	0.00987195	0.0034842	0.00354515	0.00673869	0.00221432	-0.342533	0.719862	-0.862346	0.200049	-0.365447	0.383479	0.771987	0.211561
MSTs	A228001-101	0.0163052	0.0147494	0.019888	0.011187	0.0070379	0.00410516	0.0038742	0.00371048	0.144679	0.830073	-0.28656	0.398834	-0.000943477	0.961944	0.267662	0.292761
MSTs	D226501	0.0222692	0.0202862	0.0184958	0.0122036	0.00468452	3.63146e-05	0.00279293	0.00313011	0.134549	0.599891	0.267848	0.733189	0.471129	0.0824449	0.184485	0.316869
MSTs	A230002-101	0.0111795	0.00747175	0.00658938	0.00286552	0.00459962	0.00198933	0.000189722	0.00135108	0.581333	1.20135	0.762636	1.38265	0.980135	0.0270688	0.0463025	0.27501
MSTs	similar to Glycerolaldopyranosid	0.021306	0.0146062	0.0141776	0.00508341	0.00792809	0.00209155	0.00146297	0.00188166	0.544676	1.47975	0.587643	1.52272	0.898789	0.0114962	0.0136595	0.107721
MSTs	A237001-101	0.0216208	0.0118672	0.0064572	0.00141722	0.00938588	0.00290206	0.0003891	0.000664171	0.865433	2.18785	1.74344	3.06585	2.0884	0.000354497	0.00508886	0.0744721
MSTs	A237002-101	0.0149499	0.0161205	0.0189743	0.0110552	0.00657103	0.00353021	0.00516121	0.00101444	-0.108762	0.779323	-0.343907	0.544179	0.049166	0.968135	0.527233	0.187925
MSTs	A241003-101	0.00183225	0.00361488	0.0189341	0.00661163	0.000241869	0.00234336	0.00582248	0.00254077	-0.98033	1.51791	-3.36929	-0.871058	-2.22951	0.000844314	0.341883	0.0276813
MSTs	D255515	0.00182321	0.0052474	0.0172636	0.0152266	0.000434523	0.00389052	0.00533581	0.0074713	-1.52512	0.181147	-3.24318	-1.53691	-2.2001	0.00123204	0.428837	0.188704
MSTs	D262250	0.0033552	0.00234672	0.0093206	0.0115884	0.00144275	0.00033458	0.00291659	0.00976498	0.515755	-0.314186	-1.47402	-2.30397	-1.87461	0.0299382	0.594522	0.914104
MSTs	A259008-101	0.00675323	0.00511545	0.0133428	0.00533771	0.000791194	0.00113229	0.00853506	0.0017563	0.400717	1.32177	-0.982412	-0.0613609	-0.654375	0.34375	0.0689013	0.373307
MSTs	D260482	0.0217114	0.0231524	0.0219263	0.0191353	0.00308747	0.00237358	0.00263098	0.00542085	-0.0927057	0.196426	-0.0142057	0.274926	0.127764	0.446506	0.704829	0.395841
MSTs	A262001-101	0.00132594	0.00157196	0.000890578	0.0105759	0.00083238	0.000362943	0.000284346	0.0143421	-0.245541	-3.56989	0.574205	-2.75015	-1.98434	0.914871	0.542524	0.827796
MSTs	A267001-101	0.0111638	0.0109121	0.0167848	0.0131005	0.00147832	0.00179667	0.00657134	0.00166654	0.032894	0.357529	-0.58833	-0.263695	-0.436966	0.164183	0.569306	0.679881
MSTs	A275003-101	0.00549567	0.00523575	0.0105154	0.0132103	0.00107071	0.0018147	0.00114601	0.00800413	0.0698975	-0.329157	-0.936137	-1.33519	-1.14461	0.0159169	0.967623	0.757646
MSTs	A276008-101	0.00443118	0.00593065	0.0158118	0.00837862	0.0025799	0.0021188	0.00622189	0.00197364	-0.420498	0.916219	-1.83524	-0.498523	-1.22316	0.0162615	0.761824	0.12132
MSTs	A279007-101	0.0181858	0.0190965	0.0191747	0.0170412	0.00622327	0.0037617	0.00330374	0.00490707	-0.0704982	0.170176	-0.0763903	0.164284	0.0418697	0.927408	0.883206	0.555235
MSTs	D278931	0.0234248	0.0235906	0.0198153	0.0209972	0.00309868	0.00276907	0.00130242	0.00698009	-0.0101738	-0.0835825	0.241419	0.16801	0.204119	0.302941	0.999106	0.952682
MSTs	A284009-101	0.000294992	0.000339712	0.000388938	0.000217984	5.19393e-05	4.59298e-05	0.00015067	6.80493e-05	-0.20364	0.83532	-0.398867	0.640094	0.0645733	0.570854	0.439892	0.193152
MSTs	A288003-101	0.00922223	0.00773364	0.0175081	0.0116907	0.000931693	0.00122585	0.00628615	0.00273085	0.253967	0.582666	-0.924838	-0.596139	-0.784125	0.0176287	0.127234	0.575502
MSTs	A288004-101	0.0103941	0.00886986	0.0165192	0.0164393	0.00262544	0.00256303	0.00206258	0.0103405	0.228787	0.00698943	-0.668371	-0.890168	-0.774743	0.108143	0.510545	0.98077
MSTs	A295006-101	0.0164404	0.0168165	0.0025133	0.00127806	0.00723158	0.0108887	0.000328716	0.000470529	-0.0326289	0.975624	2.70959	3.71785	3.13287	0.000446685	0.288723	0.386217
MSTs	A295012-101	0.0186137	0.0171544	0.0186468	0.0170781	0.00425526	0.00499231	0.00473293	0.00790266	0.117784	0.126781	-0.00256724	0.00642947	0.00174059	0.884323	0.581016	0.883469
MSTs	A302001-101	0.0060403	0.00974708	0.0221602	0.0162627	0.00210516	0.00499016	0.00436091	0.00805116	-0.690351	0.446402	-1.87528	-0.738526	-1.28319	0.0119517	0.988401	0.198565
MSTs	A306001-101	0.0120541	0.011062	0.0153501	0.0169153	0.00503377	0.00372941	0.00178593	0.010237	0.123907	-0.140078	-0.348722	-0.612707	-0.481084	0.338638	0.80875	0.96663
MSTs	A311002-101	0.0232996	0.0142169	0.0151091	0.0105666	0.00254649	0.0026182	0.00448086	0.00841471	0.712697	0.515915	0.624883	0.428101	0.547122	0.116489	0.0958	0.846598
