# Supplementary material for: Imbalanced Regulation of Fungal Nutrient Transports According to Phosphate Availability in a Symbiocosm Formed by Poplar, Sorghum, and Rhizophagus irregularis
Source: PubMed Central journal article supplement (PMC6920215; doi:10.3389/fpls.2019.01617), 2019-12-12
Supplement: Table_1.pdf [file Table_1.pdf]

| Name       | Sequence (5' -> 3')      | Transcript ID        | Reference                        |                                    |
|------------|--------------------------|----------------------|----------------------------------|------------------------------------|
| PtPht1.1f  | GCGATTCACGAGGTTTTCA      | Potri.010G072000     | Loth-Pereda <i>et al.</i> (2011) |                                    |
| PtPht1.1r  | GGCGAAGAAAAAGGTCAACG     |                      |                                  |                                    |
| PtPht1.2f  | CACAGACCGAACGAAGACTG     | Potri.010G071700     | Loth-Pereda <i>et al.</i> (2011) |                                    |
| PtPht1.2r  | ATCACACTGAAGCCATCCTAGC   |                      |                                  |                                    |
| PtPht1.3f  | ACCACCGAATTGGCTTCG       | Potri.010G071500     | Loth-Pereda <i>et al.</i> (2011) |                                    |
| PtPht1.3r  | ATGGCAAGTAGACCTCAATCTCG  |                      |                                  |                                    |
| PtPht1.4f  | GATCTTCCCTGCAAGGTTAAGG   | Potri.005G223500     | Loth-Pereda <i>et al.</i> (2011) |                                    |
| PtPht1.4r  | TCCTGTGCGGGCTCTG         |                      |                                  |                                    |
| PtPht1.5f  | GGACCCAATGCCACCAC        | Potri.002G038900     | Loth-Pereda <i>et al.</i> (2011) |                                    |
| PtPht1.5r  | CTTGGCCTGGTCTGATTC       |                      |                                  |                                    |
| PtPht1.6f  | ATCGCCAGGGCTCAATTC       | Potri.005G175500     | Loth-Pereda <i>et al.</i> (2011) |                                    |
| PtPht1.6r  | CTATTATTGCGCCAGCCTTC     |                      |                                  |                                    |
| PtPht1.7f  | CGAATTGGATTCTGTGTTATG    | Potri.005G223600     | Loth-Pereda <i>et al.</i> (2011) |                                    |
| PtPht1.7r  | CCTGTCTGGTCTGAGC         |                      |                                  |                                    |
| PtPht1.8f  | GATAGGATCGGAAGGTTATAATC  | Potri.019G061900     | Loth-Pereda <i>et al.</i> (2011) |                                    |
| PtPht1.8r  | GGTGACCACCACAGAAATCC     |                      |                                  |                                    |
| PtPht1.9f  | GATCACCTACAATTTCTTCTG    | Potri.002G005500     |                                  |                                    |
| PtPht1.9r  | GGTGAAGTAGGAGTAATCAGATAC |                      |                                  |                                    |
| PtPht1.10f | TGCTAATGCTTGGTGCTTG      | Potri.015G022800     | Loth-Pereda <i>et al.</i> (2011) |                                    |
| PtPht1.10r | GATGAACATGGCAGGAGATG     |                      |                                  |                                    |
| PtPht1.11f | GCCACCCAAAGACTTCTGTC     | Potri.005G256100     |                                  |                                    |
| PtPht1.11r | TTCAATCATCTGATAGGACACCA  |                      |                                  |                                    |
| PtPht1.12f | GGAAACCATGTGGGAGTGC      | Potri.001G318500     |                                  |                                    |
| PtPht1.12r | CTGGCCAGCTAAAGTTCCAC     |                      |                                  |                                    |
| PtrAMT1.1f | TTCGCAAGCTCAAGCTC        | Potri.010G063500     | Selle <i>et al.</i> (2005)       |                                    |
| PtrAMT1.1r | AATATGAGGTCCCTCTTAGACG   |                      | Couturier <i>et al.</i> (2007)   |                                    |
| PtrAMT1.2f | GCCTGCGAAGAACACCTC       | Potri.019G023600     |                                  |                                    |
| PtrAMT1.2r | GCATCAAACCTTGATCACACATTG |                      | Couturier <i>et al.</i> (2007)   |                                    |
| PtrAMT3.1f | GCCGTGCATGGTGAAGAG       | Potri.001G305400     |                                  |                                    |
| PtrAMT3.1r | TTGATGACTTGGCTCCA        |                      |                                  |                                    |
| PtrSUT1f   | CCCACCAGTAGTAGTGC        | Potri.013G115200     |                                  |                                    |
| PtrSUT1r   | CCAGTCACTAGTCTTGGAAAGG   |                      |                                  |                                    |
| PtrSUT3f   | CTGGTGCTGGCCAAGG         | Potri.019G085800     |                                  |                                    |
| PtrSUT3r   | GGCATCCCAAGGTCCAC        |                      |                                  |                                    |
| PtrSUT4f   | AGGCAGGGTGAGGAGGAT       | Potri.002G106900     |                                  |                                    |
| PtrSUT4r   | AGCGACACGACCTTCCAG       |                      |                                  |                                    |
| PtrSUT5f   | GCGGTGGCCAAGGATT         | Potri.008G148100     |                                  |                                    |
| PtrSUT5r   | GAACGAAGGCTGGTATA        |                      |                                  |                                    |
| PtrSUT6f   | GGTCTACAGTCAGAGAGATGGTTC | Potri.010G093600     |                                  |                                    |
| PtrSUT6r   | AGCGTTCTGCGCGCTTCT       |                      |                                  |                                    |
| PtUBI f    | GCAGGGAAACAGTGAGGAAGG    | Potri.015G013600     |                                  |                                    |
| PtUBI r    | TGGACTCACGAGGACAG        |                      |                                  |                                    |
|            |                          |                      |                                  |                                    |
| SbPht1.1f  | GGCCAAGGTGCTCAAGAAG      | Sobic.001G502000     | Walder <i>et al.</i> (2015)      |                                    |
| SbPht1.1b  | GGAGGAACTGCACCGAGAAG     |                      |                                  |                                    |
| SbPht1.2f  | ACTAAGCAGCAGCCTCCGTA     | Sobic.006G027300     | Walder <i>et al.</i> (2015)      |                                    |
| SbPht1.2b  | AAGCCACAAGGAAACCATTG     |                      |                                  |                                    |
| SbPht1.3f  | TACTCGCGTATGAACATGCC     | Sobic.001G513400     | Walder <i>et al.</i> (2015)      |                                    |
| SbPht1.3b  | TCCTCTTATTGCCGATGTC      |                      |                                  |                                    |
| SbPht1.4f  | GGCGCCGTCGTACCAGGACAA    | Sobic.001G234900     | Walder <i>et al.</i> (2015)      |                                    |
| SbPht1.4b  | GAGCGCCGCCGGATGGT        |                      |                                  |                                    |
| SbPht1.5f  | GAGAATCTGGACGAGATCAC     | Sobic.001G502100     | Walder <i>et al.</i> (2015)      |                                    |
| SbPht1.5b  | CAGGTTCTGGCTGTAGTAGG     |                      |                                  |                                    |
| SbPht1.6f  | CAAGCTCGGCCGTAAGAAGG     | Sobic.007G164400     | Walder <i>et al.</i> (2015)      |                                    |
| SbPht1.6b  | GCCAGAAGCGGAAGAAGCAC     |                      |                                  |                                    |
| SbPht1.7f  | GGACACCAGCAAGGACAAC      | Sobic.001G234800     | Walder <i>et al.</i> (2015)      |                                    |
| SbPht1.7b  | CGCGATGGAGCAGATGAC       |                      |                                  |                                    |
| SbPht1.8f  | GCAGCGAGGCCAATGAGACT     | Sobic.002G116100     | Walder <i>et al.</i> (2015)      |                                    |
| SbPht1.8b  | TTGGCTCCGGTAGGAAGCAG     |                      |                                  |                                    |
| SbPht1.9f  | GAGGACGAGCCGTTCAAGAG     | Sobic.006G026900     | Walder <i>et al.</i> (2015)      |                                    |
| SbPht1.9b  | CGCGACGGAGAAGAAGTACC     |                      |                                  |                                    |
| SbPht1.10f | CACCATGTGCTGGTTACTTC     | Sobic.006G026800     | Walder <i>et al.</i> (2015)      |                                    |
| SbPht1.10b | GATAATCGCCTGAGTACGTG     |                      |                                  |                                    |
| SbPht1.11f | CGTGGTTCCTTCTGGACATA     | Sobic.003G243400     | Walder <i>et al.</i> (2015)      |                                    |
| SbPht1.11b | TCTCGAACACCTCCTTGAGT     |                      |                                  |                                    |
| SbSUT1f    | GTGCTCCTGTAATCTTTGTGTC   | Sb01g045720          |                                  |                                    |
| SbSUT1r    | ACTATACTGCACATTGATTGATCG |                      |                                  |                                    |
| SbSUT2f    | GCACATGCATTGAATGAACC     | Sb04g038030          |                                  |                                    |
| SbSUT2r    | TTCGCATTTGGAAATTCCTC     |                      |                                  |                                    |
| SbSUT3f    | GGCCGGATCAAACAAGAT       | Sb01g022430          |                                  |                                    |
| SbSUT3r    | GGCATTGCGAAGGAATGA       |                      |                                  |                                    |
| SbSUT4f    | CGATCCATGATGATGTCCAG     | Sb08g023310          |                                  |                                    |
| SbSUT4r    | GTTCCAGGCCCTTGCTGTC      |                      |                                  |                                    |
| SbSUT5f    | CCCAGTAGTGTGCGGAGTC      | Sb04g023860          |                                  |                                    |
| SbSUT5r    | CCAATGGATCGGAAAATAAAG    |                      |                                  |                                    |
| SbSUT6f    | GCACAACAGCACAAAGAAGG     | Sb07g028120          |                                  |                                    |
| SbSUT6r    | AGGCAGAAGAGGCTGAGATG     |                      |                                  |                                    |
| SbAMT1;1f  | GCTGTGGTTGCGGCTGGTA      | Sb06g022230          | Koegel <i>et al.</i> (2013)      |                                    |
| SbAMT1;1r  | GGACTTGAGGATGGTGGTGAA    |                      |                                  |                                    |
| SbAMT1;2f  | TCCATTGCTCCTCGTTGC       | Sb09g023030          | Koegel <i>et al.</i> (2013)      |                                    |
| SbAMT1;2r  | GGCTTTGCTCCCTCTCC        |                      |                                  |                                    |
| SbAMT2;1f  | TCCCGCCCGCCTACAGCT       | Sb09g023030          | Koegel <i>et al.</i> (2013)      |                                    |
| SbAMT2;1r  | GTCACCATTGAGCTGTAG       |                      |                                  |                                    |
| SbAMT2;2f  | GCGGCTTCTCTACCAGTG       | Sb03g038840          | Koegel <i>et al.</i> (2013)      |                                    |
| SbAMT2;2r  | CCTCTCCCTGTCGCTCTTC      |                      |                                  |                                    |
| SbAMT3;1f  | GGCCTCGTCTGCATCACT       | Sb03g041140          | Koegel <i>et al.</i> (2013)      |                                    |
| SbAMT3;1r  | GGGTGCTGTCACCTTGCT       |                      |                                  |                                    |
| SbAMT3;2f  | CCGACGCACTCTATCTGTA      | Sb01g001970          | Koegel <i>et al.</i> (2013)      |                                    |
| SbAMT3;2r  | TCGCTGCTTATTGGGGTTAG     |                      |                                  |                                    |
| SbAMT3.3f  | CGTCATTGCCTGGAACATC      | Sb04g022390          | Koegel <i>et al.</i> (2013)      |                                    |
| SbAMT3.3r  | AGCATCATCCCCGATAAGC      |                      |                                  |                                    |
| SbAMT4f    | CGAACAACATTCTCTGACG      | Sb01g008060          | Koegel <i>et al.</i> (2013)      |                                    |
| SbAMT4r    | CCCGAACACGAAGCAGTC       |                      |                                  |                                    |
| SbUBIf     | CAAGGAGTGCCCCAACAC       | Sb10g026870          | Koegel <i>et al.</i> (2013)      |                                    |
| SbUBIr     | TGGTAGGCCGGTAAAGCAA      |                      |                                  |                                    |
|            |                          |                      |                                  |                                    |
|            |                          | <b>Transcript ID</b> | <b>Protein ID</b>                |                                    |
| GintAMT1f  | TGTGTCAGCATTGTCTTCAGT    | 337137               | 337025                           | López-Pedrosa <i>et al.</i> (2006) |
| GintAMT1r  | GGCAAGTGCGGGTGTAATAG     |                      |                                  |                                    |
| GintAMT2f  | GTGCCAATGCCGCTAACA       | 314321               | 314209                           | Pérez-Tienda <i>et al.</i> (2011)  |
| GintAMT2r  | GCCAGAACAGAATCCCCAAAG    |                      |                                  |                                    |
| GintAMT3f  | GGG CTT GAC TTT GCT GGT  | 218287               | 218175                           |                                    |
| GintAMT3r  | TTC GTC CCT TCC ATG ACC  |                      |                                  |                                    |
| RiPT1f     | ATGGGTTTCGCTGTCCTCAC     | 345640               | 345528                           |                                    |
| RiPT1r     | CCCCTGGAACGATGAATG       |                      |                                  |                                    |
| RiPT3      | CGGCGGTGATTATCCTCT       | 7378                 | 7266                             |                                    |
| RiPT3      | GCCGCCATCATTGCTC         |                      |                                  |                                    |
| RiPT5f     | GGCGCGAATACGTCAGAA       | 346370               | 346258                           |                                    |
| RiPT5r     | GCTGCAACACCAACACCA       |                      |                                  |                                    |
| RiPT7      | GATCCTGGACTGGAACAC       | 67530                | 67418                            |                                    |
| RiPT7r     | GCGATGACTCCCATATCACC     |                      |                                  |                                    |
| RiMST2f    | GGCAGGATATTTGTCTGATAG    | 341721               | 341609                           | Helber <i>et al.</i> (2011)        |
| RiMST2r    | GCAATAACTCTTCCCGTATAC    |                      |                                  |                                    |
| RiMST3f    | ATTCTCGATTCTGGTGCATC     | 34584                | 34472                            | Helber <i>et al.</i> (2011)        |
| RiMST3r    | ATACGCCAGCAACGACTC       |                      |                                  |                                    |
| RiMST4f    | TAGCTACATTTGCTATTGGTTTAG | 155358               | 155246                           | Helber <i>et al.</i> (2011)        |
| RiMST4r    | CCCTAACTTCCAAAATAATGAAC  |                      |                                  |                                    |
| RiTEFf     | TGACAGGCGATCTGGTAAGG     |                      |                                  |                                    |
| RiTEF      | TCAGCGAAGGTCTCAACCAC     |                      |                                  |                                    |
