# Supplementary material for: Imbalanced Regulation of Fungal Nutrient Transports According to Phosphate Availability in a Symbiocosm Formed by Poplar, Sorghum, and Rhizophagus irregularis
Source: PubMed Central journal article supplement (PMC6920215; doi:10.3389/fpls.2019.01617), 2019-12-12
Supplement: Table_2.pdf [file Table_2.pdf]

| Plant                 | Treatment | Arbuscule       |      |                 |             |                 |      |
|-----------------------|-----------|-----------------|------|-----------------|-------------|-----------------|------|
|                       |           | Hyphae (%)      |      |                 | Vesicle (%) |                 |      |
| <i>P. trichocarpa</i> | low Pi    | 79 <sup>a</sup> | ± 10 | 34 <sup>a</sup> | ± 8         | 10 <sup>a</sup> | ± 8  |
|                       | high Pi   | 87 <sup>a</sup> | ± 6  | 34 <sup>a</sup> | ± 8         | 9 <sup>a</sup>  | ± 4  |
| <i>S. bicolor</i>     | low Pi    | 94 <sup>a</sup> | ± 5  | 16 <sup>a</sup> | ± 7         | 37 <sup>a</sup> | ± 11 |
|                       | high Pi   | 93 <sup>a</sup> | ± 5  | 5 <sup>b</sup>  | ± 5         | 43 <sup>a</sup> | ± 17 |
