# Supplementary material for: Imbalanced Regulation of Fungal Nutrient Transports According to Phosphate Availability in a Symbiocosm Formed by Poplar, Sorghum, and Rhizophagus irregularis
Source: PubMed Central journal article supplement (PMC6920215; doi:10.3389/fpls.2019.01617), 2019-12-12
Supplement: Table_3.pdf [file Table_3.pdf]

| Gene ID          | kogid   | kogdefine                                   | kogClass                                     | kogGroup   | TAIR10    | TAIR10_define                                     | Mean number of reads |        |         |         |        |        | log2 fold change |                |                |                |                |                | padj           |              |                |                |                |                |                |                |
|------------------|---------|---------------------------------------------|----------------------------------------------|------------|-----------|---------------------------------------------------|----------------------|--------|---------|---------|--------|--------|------------------|----------------|----------------|----------------|----------------|----------------|----------------|--------------|----------------|----------------|----------------|----------------|----------------|----------------|
|                  |         |                                             |                                              |            |           |                                                   | +AM                  | -AM    | IP +AM  | hP +AM  | IP -AM | hP -AM | +AM vs -AM       | +P-Gi vs -P-Gi | +P-Gi vs +P+Gi | +P+Gi vs -P-Gi | +P+Gi vs -P+Gi | -P+Gi vs +P-Gi | -P+Gi vs -P-Gi | +AM vs -AM   | +P-Gi vs -P-Gi | +P-Gi vs +P+Gi | +P+Gi vs -P-Gi | +P+Gi vs -P+Gi | -P+Gi vs +P-Gi | -P+Gi vs -P-Gi |
| Potri.004G111400 | KOG1305 | Amino acid transporter protein              | Amino acid transport and metabolism          | METABOLISM | At3g30390 | Transmembrane amino acid transporter family prote | 9132,2               | 4260,3 | 7247,8  | 10175,9 | 4790,7 | 4131,3 | -1,1             | 0,2            | 1,3            | 1,1            | -0,4           | 0,9            | 0,7            | <b>0,000</b> | 0,916          | <b>0,001</b>   | <b>0,002</b>   | 0,615          | <b>0,016</b>   | <b>0,047</b>   |
| Potri.001G007300 | KOG1287 | Amino acid transporters                     | Amino acid transport and metabolism          | METABOLISM | At3g13620 | Amino acid permease family protein                | 2422,2               | 1284,3 | 2132,1  | 2488,3  | 1372,6 | 1315,6 | -0,9             | 0,0            | 0,9            | 1,0            | -0,2           | 0,7            | 0,8            | <b>0,002</b> | 0,991          | 0,096          | <b>0,000</b>   | 0,803          | 0,241          | <b>0,008</b>   |
| Potri.001G335200 | KOG1303 | Amino acid transporters                     | Amino acid transport and metabolism          | METABOLISM | At5g40780 | lysine histidine transporter 1                    | 174,8                | 23,3   | 130,6   | 202,4   | 25,0   | 23,4   | -2,6             | 0,0            | 2,5            | 2,8            | -0,4           | 2,0            | 2,1            | <b>0,000</b> | 0,990          | <b>0,000</b>   | <b>0,000</b>   | 0,731          | <b>0,006</b>   | <b>0,000</b>   |
| Potri.001G335300 | KOG1303 | Amino acid transporters                     | Amino acid transport and metabolism          | METABOLISM | At5g40780 | lysine histidine transporter 1                    | 12148,7              | 5498,0 | 13220,6 | 9941,8  | 5871,3 | 5636,1 | -1,1             | 0,0            | 0,9            | 0,8            | 0,4            | 1,2            | 1,2            | <b>0,000</b> | 0,990          | <b>0,017</b>   | <b>0,023</b>   | 0,682          | <b>0,007</b>   | <b>0,006</b>   |
| Potri.002G078300 | KOG1289 | Amino acid transporters                     | Amino acid transport and metabolism          | METABOLISM | At2g01170 | bidirectional amino acid transporter 1            | 301,7                | 102,0  | 311,0   | 264,1   | 134,6  | 79,1   | -1,5             | 0,5            | 1,6            | 1,1            | 0,2            | 1,8            | 1,2            | <b>0,000</b> | 0,646          | <b>0,001</b>   | <b>0,000</b>   | 0,869          | <b>0,002</b>   | <b>0,006</b>   |
| Potri.002G079500 | KOG1303 | Amino acid transporters                     | Amino acid transport and metabolism          | METABOLISM | At1g77380 | amino acid permease 3                             | 1037,3               | 130,3  | 1294,1  | 682,4   | 182,0  | 91,6   | -2,5             | 0,7            | 2,5            | 1,8            | 0,5            | 3,0            | 2,3            | <b>0,000</b> | 0,553          | <b>0,000</b>   | <b>0,000</b>   | NA             | <b>0,000</b>   | <b>0,000</b>   |
| Potri.003G138100 | KOG1303 | Amino acid transporters                     | Amino acid transport and metabolism          | METABOLISM | At5g41800 | Transmembrane amino acid transporter family prote | 721,7                | 294,8  | 603,1   | 773,9   | 427,4  | 191,9  | -1,2             | 0,8            | 1,9            | 0,9            | -0,3           | 1,6            | 0,6            | <b>0,002</b> | 0,278          | <b>0,000</b>   | <b>0,020</b>   | 0,795          | <b>0,002</b>   | 0,284          |
| Potri.008G036300 | KOG1303 | Amino acid transporters                     | Amino acid transport and metabolism          | METABOLISM | At2g39130 | Transmembrane amino acid transporter family prote | 165,8                | 471,0  | 203,8   | 112,3   | 626,3  | 362,2  | 1,4              | 0,6            | -1,4           | -2,1           | 0,7            | -0,6           | -1,4           | <b>0,000</b> | 0,588          | <b>0,014</b>   | <b>0,000</b>   | 0,336          | 0,294          | <b>0,000</b>   |
| Potri.010G221900 | KOG1303 | Amino acid transporters                     | Amino acid transport and metabolism          | METABOLISM | At5g19500 | Tryptophan/tyrosine permease                      | 112,2                | 34,3   | 110,0   | 103,8   | 39,7   | 32,6   | -1,6             | 0,2            | 1,6            | 1,4            | 0,1            | 1,7            | 1,5            | <b>0,000</b> | 0,920          | <b>0,000</b>   | <b>0,000</b>   | 0,956          | <b>0,003</b>   | <b>0,002</b>   |
| Potri.010G226000 | KOG1303 | Amino acid transporters                     | Amino acid transport and metabolism          | METABOLISM | At2g39130 | Transmembrane amino acid transporter family prote | 3799,5               | 1519,8 | 2992,1  | 4257,2  | 1615,2 | 1565,4 | -1,3             | 0,0            | 1,4            | 1,5            | -0,4           | 1,0            | 1,0            | <b>0,000</b> | 0,995          | <b>0,001</b>   | <b>0,000</b>   | 0,569          | 0,072          | <b>0,004</b>   |
| Potri.013G030900 | KOG1286 | Amino acid transporters                     | Amino acid transport and metabolism          | METABOLISM | At4g21120 | amino acid transporter 1                          | 816,5                | 187,7  | 658,0   | 899,8   | 200,9  | 192,1  | -2,0             | 0,0            | 2,2            | 2,2            | -0,3           | 1,6            | 1,6            | <b>0,000</b> | 0,985          | <b>0,000</b>   | <b>0,000</b>   | 0,795          | <b>0,005</b>   | <b>0,002</b>   |
| Potri.002G258700 | KOG1237 | H+/oligopeptide symporter                   | Amino acid transport and metabolism          | METABOLISM | At5g46050 | peptide transporter 3                             | 2477,2               | 543,7  | 1762,0  | 2965,7  | 790,6  | 351,7  | -1,8             | 0,5            | 2,4            | 1,8            | -0,5           | 1,8            | 1,1            | <b>0,000</b> | 0,715          | <b>0,000</b>   | <b>0,000</b>   | 0,579          | <b>0,017</b>   | 0,065          |
| Potri.002G258900 | KOG1237 | H+/oligopeptide symporter                   | Amino acid transport and metabolism          | METABOLISM | At5g46050 | peptide transporter 3                             | 77,5                 | 1,2    | 71,8    | 76,1    | 1,1    | 1,3    | -4,3             | 0,0            | 3,4            | 3,3            | 0,0            | 3,7            | 3,8            | <b>0,000</b> | NA             | NA             | NA             | 0,983          | <b>0,000</b>   | <b>0,000</b>   |
| Potri.005G233500 | KOG1237 | H+/oligopeptide symporter                   | Amino acid transport and metabolism          | METABOLISM | At3g54140 | peptide transporter 1                             | 702,2                | 11,7   | 724,8   | 614,6   | 11,4   | 12,8   | -5,1             | -0,1           | 4,1            | 4,5            | 0,1            | 4,8            | 5,2            | <b>0,000</b> | 0,968          | <b>0,000</b>   | <b>0,000</b>   | 0,922          | <b>0,000</b>   | <b>0,000</b>   |
| Potri.010G068100 | KOG1237 | H+/oligopeptide symporter                   | Amino acid transport and metabolism          | METABOLISM | At5g46050 | peptide transporter 3                             | 1367,5               | 371,7  | 1243,4  | 1364,7  | 322,6  | 453,6  | -1,8             | -0,4           | 1,6            | 2,1            | -0,1           | 1,4            | 1,9            | <b>0,000</b> | 0,773          | <b>0,000</b>   | <b>0,000</b>   | 0,944          | <b>0,022</b>   | <b>0,000</b>   |
| Potri.001G286600 | KOG1330 | Sugar transporter/spinster transmembrane    | Carbohydrate transport and metabolism        | METABOLISM | At5g64500 | Major facilitator superfamily protein             | 1303,7               | 636,3  | 1483,6  | 1001,3  | 726,2  | 606,4  | -1,0             | 0,2            | 0,8            | 0,6            | 0,5            | 1,3            | 1,1            | <b>0,000</b> | 0,877          | <b>0,040</b>   | 0,076          | 0,540          | <b>0,002</b>   | <b>0,003</b>   |
| Potri.001G111000 | KOG1582 | UDP-galactose transporter related protein   | Carbohydrate transport and metabolism        | METABOLISM | At4g23010 | UDP-galactose transporter 2                       | 1253,2               | 549,0  | 1435,1  | 953,9   | 587,1  | 562,1  | -1,1             | 0,0            | 0,8            | 0,8            | 0,5            | 1,4            | 1,4            | <b>0,000</b> | 0,984          | <b>0,022</b>   | <b>0,001</b>   | 0,496          | <b>0,002</b>   | <b>0,000</b>   |
| Potri.010G194100 | KOG4852 | Glucose-6-phosphate/phosphate and phosph    | Carbohydrate transport and metabolism ;Amino | METABOLISM | At3g11320 | Nucleotide-sugar transporter family protein       | 5671,2               | 3045,8 | 6615,1  | 4195,6  | 3722,3 | 2662,1 | -0,8             | 0,4            | 0,7            | 0,3            | 0,5            | 1,2            | 0,8            | <b>0,040</b> | 0,789          | <b>0,016</b>   | 0,505          | NA             | 0,056          | 0,195          |
| Potri.002G112100 | KOG1303 | Amino acid transporters                     | Amino acid transport and metabolism          | METABOLISM | At5g49630 | amino acid permease 6                             | 271,7                | 935,0  | 293,8   | 224,7   | 733,3  | 1218,3 | 1,7              | -0,5           | -2,0           | -1,4           | 0,3            | -1,7           | -1,1           | <b>0,000</b> | 0,721          | <b>0,000</b>   | <b>0,000</b>   | 0,685          | <b>0,002</b>   | <b>0,007</b>   |
| Potri.002G137000 | KOG1286 | Amino acid transporters                     | Amino acid transport and metabolism          | METABOLISM | At1g05940 | cationic amino acid transporter 9                 | 1061,3               | 1601,5 | 896,2   | 1128,0  | 1699,1 | 1652,4 | 0,6              | 0,0            | -0,4           | -0,4           | -0,3           | -0,7           | -0,7           | <b>0,000</b> | 0,992          | 0,077          | <b>0,004</b>   | 0,707          | 0,066          | <b>0,019</b>   |
| Potri.004G172800 | KOG1303 | Amino acid transporters                     | Amino acid transport and metabolism          | METABOLISM | At2g21050 | like AUXIN RESISTANT 2                            | 134,0                | 348,0  | 120,8   | 134,6   | 341,3  | 386,3  | 1,3              | -0,2           | -1,3           | -1,1           | -0,1           | -1,4           | -1,2           | <b>0,000</b> | 0,905          | <b>0,001</b>   | <b>0,003</b>   | 0,936          | <b>0,009</b>   | <b>0,011</b>   |
| Potri.008G017100 | KOG1286 | Amino acid transporters                     | Amino acid transport and metabolism          | METABOLISM | At5g04770 | cationic amino acid transporter 6                 | 47,7                 | 149,5  | 37,8    | 52,6    | 117,9  | 193,9  | 1,5              | -0,4           | -1,4           | -1,0           | -0,3           | -1,8           | -1,4           | <b>0,000</b> | 0,788          | <b>0,038</b>   | <b>0,005</b>   | 0,754          | <b>0,007</b>   | <b>0,000</b>   |
| Potri.008G066400 | KOG1303 | Amino acid transporters                     | Amino acid transport and metabolism          | METABOLISM | At2g38120 | Transmembrane amino acid transporter family prote | 83,3                 | 158,0  | 52,8    | 106,4   | 185,3  | 145,8  | 0,9              | 0,2            | -0,3           | -0,6           | -0,8           | -1,2           | -1,5           | <b>0,015</b> | 0,867          | 0,567          | 0,109          | 0,181          | <b>0,019</b>   | <b>0,000</b>   |
| Potri.010G191000 | KOG1303 | Amino acid transporters                     | Amino acid transport and metabolism          | METABOLISM | At2g38120 | Transmembrane amino acid transporter family prote | 706,8                | 1135,0 | 616,2   | 732,0   | 1111,8 | 1261,8 | 0,7              | -0,2           | -0,6           | -0,4           | -0,2           | -0,9           | -0,7           | <b>0,003</b> | 0,784          | 0,124          | 0,223          | 0,850          | <b>0,034</b>   | 0,057          |
| Potri.014G036500 | KOG1303 | Amino acid transporters                     | Amino acid transport and metabolism          | METABOLISM | At1g47670 | Transmembrane amino acid transporter family prote | 453,8                | 1105,5 | 330,0   | 536,3   | 1188,4 | 1125,6 | 1,2              | 0,0            | -0,9           | -1,0           | -0,6           | -1,5           | -1,6           | <b>0,000</b> | 0,983          | 0,071          | <b>0,000</b>   | 0,169          | <b>0,002</b>   | <b>0,000</b>   |
| Potri.017G083700 | KOG1303 | Amino acid transporters                     | Amino acid transport and metabolism          | METABOLISM | At5g15240 | Transmembrane amino acid transporter family prote | 267,5                | 1935,0 | 337,6   | 172,2   | 1320,1 | 2714,1 | 2,6              | -0,8           | -3,5           | -2,6           | 0,7            | -2,5           | -1,6           | <b>0,000</b> | 0,348          | <b>0,000</b>   | <b>0,000</b>   | 0,328          | <b>0,000</b>   | <b>0,001</b>   |
| Potri.019G039600 | KOG1286 | Amino acid transporters                     | Amino acid transport and metabolism          | METABOLISM | At3g03720 | cationic amino acid transporter 4                 | 867,3                | 3767,5 | 834,4   | 819,7   | 3385,0 | 4487,4 | 2,1              | -0,4           | -2,2           | -1,8           | 0,0            | -2,2           | -1,8           | <b>0,000</b> | 0,758          | <b>0,000</b>   | <b>0,000</b>   | 0,980          | <b>0,000</b>   | <b>0,000</b>   |
| Potri.003G088800 | KOG1237 | H+/oligopeptide symporter                   | Amino acid transport and metabolism          | METABOLISM | At1g32450 | nitrate transporter 1.5                           | 66,5                 | 318,2  | 31,0    | 96,2    | 350,9  | 314,9  | 1,8              | 0,1            | -1,1           | -1,4           | -1,0           | -2,3           | -2,9           | <b>0,001</b> | 0,980          | 0,218          | <b>0,004</b>   | 0,148          | NA             | <b>0,000</b>   |
| Potri.014G179400 | KOG1237 | H+/oligopeptide symporter                   | Amino acid transport and metabolism          | METABOLISM | At1g32450 | nitrate transporter 1.5                           | 406,7                | 2599,7 | 316,6   | 459,7   | 2332,6 | 3099,9 | 2,1              | -0,2           | -1,5           | -1,5           | -0,3           | -2,2           | -2,3           | <b>0,000</b> | 0,928          | 0,072          | <b>0,017</b>   | 0,845          | NA             | <b>0,000</b>   |
| Potri.006G015200 | KOG0569 | Permease of the major facilitator superfami | Carbohydrate transport and metabolism        | METABOLISM | At4g16480 | inositol transporter 4                            | 402,7                | 1750,0 | 404,2   | 363,6   | 1577,0 | 2080,1 | 2,1              | -0,4           | -2,3           | -1,9           | 0,1            | -2,1           | -1,7           | <b>0,000</b> | 0,378          | <b>0,000</b>   | <b>0,000</b>   | 0,871          | <b>0,000</b>   | <b>0,000</b>   |
| Potri.015G008100 | KOG4332 | Predicted sugar transporter                 | Carbohydrate transport and metabolism        | METABOLISM | At4g27720 | Major facilitator superfamily protein             | 726,7                | 1320,5 | 560,2   | 826,4   | 1401,2 | 1362,3 | 0,8              | 0,0            | -0,6           | -0,6           | -0,5           | -1,1           | -1,1           | <b>0,003</b> | 0,996          | 0,260          | <b>0,042</b>   | 0,537          | <b>0,033</b>   | <b>0,001</b>   |
| Potri.005G075600 | KOG2234 | Predicted UDP-galactose transporter         | Carbohydrate transport and metabolism        | METABOLISM | At5g65000 | Nucleotide-sugar transporter family protein       | 491,3                | 969,8  | 424,2   | 512,8   | 991,2  | 1037,7 | 1,0              | -0,1           | -0,9           | -0,8           | -0,2           | -1,1           | -1,0           | <b>0,000</b> | 0,953          | <b>0,017</b>   | <b>0,003</b>   | 0,796          | <b>0,007</b>   | <b>0,001</b>   |
| Potri.010G180500 | KOG2234 | Predicted UDP-galactose transporter         | Carbohydrate transport and metabolism        | METABOLISM | At3g59360 | UDP-galactose transporter 6                       | 209,2                | 345,3  | 174,3   | 224,9   | 348,6  | 374,1  | 0,7              | -0,1           | -0,6           | -0,5           | -0,3           | -0,9           | -0,8           | <b>0,000</b> | 0,905          | <b>0,003</b>   | <b>0,034</b>   | 0,697          | <b>0,015</b>   | <b>0,023</b>   |
