# Supplementary material for: Imbalanced Regulation of Fungal Nutrient Transports According to Phosphate Availability in a Symbiocosm Formed by Poplar, Sorghum, and Rhizophagus irregularis
Source: PubMed Central journal article supplement (PMC6920215; doi:10.3389/fpls.2019.01617), 2019-12-12
Supplement: Table_5.pdf [file Table_5.pdf]

| Fungal expressed genes up-regulated by P treatment                   |                                            |                                                                                                                                           |                                                                                                                                                                                                                                                                                                                                                                                                                                                                                                                                                                                                                                                                                                                                                                                                                                                                                                                                                                                                                                                                                                                                                                                                                                                                                                                                                                                                                                                                                                                                                                                                                                                                                                                                                                                                                                                                                                                                                                                                                                                                                                                                                                                                                                                                                                                                                                                                                                                                                                                                                                                                                                                                                                                                  |                                                   | Fungal expressed genes down-regulated by P treatment                    |                                        |                                                |                                                |                                                                    | Fungal expressed genes up regulated during interaction with sorghum                |                                                                                                                                                                                                                                                                                                                                                                                                                                                                                                                                                                                                                                                                                                                                                                                                                                                                                                                                                                                                                                                                                                                                                                                                                                                                                                                                                                                                                                                                                                                                                                                                                                                                                                                       |                                                                                                                                                                                                                                                                                                                                                                                  | Fungal expressed genes up regulated during interaction with poplar |                                                                                                                                                           |                                |
|----------------------------------------------------------------------|--------------------------------------------|-------------------------------------------------------------------------------------------------------------------------------------------|----------------------------------------------------------------------------------------------------------------------------------------------------------------------------------------------------------------------------------------------------------------------------------------------------------------------------------------------------------------------------------------------------------------------------------------------------------------------------------------------------------------------------------------------------------------------------------------------------------------------------------------------------------------------------------------------------------------------------------------------------------------------------------------------------------------------------------------------------------------------------------------------------------------------------------------------------------------------------------------------------------------------------------------------------------------------------------------------------------------------------------------------------------------------------------------------------------------------------------------------------------------------------------------------------------------------------------------------------------------------------------------------------------------------------------------------------------------------------------------------------------------------------------------------------------------------------------------------------------------------------------------------------------------------------------------------------------------------------------------------------------------------------------------------------------------------------------------------------------------------------------------------------------------------------------------------------------------------------------------------------------------------------------------------------------------------------------------------------------------------------------------------------------------------------------------------------------------------------------------------------------------------------------------------------------------------------------------------------------------------------------------------------------------------------------------------------------------------------------------------------------------------------------------------------------------------------------------------------------------------------------------------------------------------------------------------------------------------------------|---------------------------------------------------|-------------------------------------------------------------------------|----------------------------------------|------------------------------------------------|------------------------------------------------|--------------------------------------------------------------------|------------------------------------------------------------------------------------|-----------------------------------------------------------------------------------------------------------------------------------------------------------------------------------------------------------------------------------------------------------------------------------------------------------------------------------------------------------------------------------------------------------------------------------------------------------------------------------------------------------------------------------------------------------------------------------------------------------------------------------------------------------------------------------------------------------------------------------------------------------------------------------------------------------------------------------------------------------------------------------------------------------------------------------------------------------------------------------------------------------------------------------------------------------------------------------------------------------------------------------------------------------------------------------------------------------------------------------------------------------------------------------------------------------------------------------------------------------------------------------------------------------------------------------------------------------------------------------------------------------------------------------------------------------------------------------------------------------------------------------------------------------------------------------------------------------------------|----------------------------------------------------------------------------------------------------------------------------------------------------------------------------------------------------------------------------------------------------------------------------------------------------------------------------------------------------------------------------------|--------------------------------------------------------------------|-----------------------------------------------------------------------------------------------------------------------------------------------------------|--------------------------------|
| Effect of HP regardless of the fungal compartment (ERM or IRM) (0/1) | Effect of HP in <i>planta</i> (IRM) (2/52) | Effect of HP specifically expressed in sorghum (13/246)                                                                                   | Effect of HP specifically expressed in poplar (237/3110)                                                                                                                                                                                                                                                                                                                                                                                                                                                                                                                                                                                                                                                                                                                                                                                                                                                                                                                                                                                                                                                                                                                                                                                                                                                                                                                                                                                                                                                                                                                                                                                                                                                                                                                                                                                                                                                                                                                                                                                                                                                                                                                                                                                                                                                                                                                                                                                                                                                                                                                                                                                                                                                                         | Effect of HP specifically expressed in ERM (3/73) | Repressed by HP regardless of the fungal compartment (ERM or IRM) (0/0) | Repressed by HP in <i>planta</i> (0/4) | Repressed by HP specifically in sorghum (0/26) | Repressed by HP specifically in poplar (6/264) | Repressed by HP specifically in ERM (7/209)                        | Effect of sorghum regardless of [Phosphate] (144/1443)                             | Effect of sorghum in LP (207/3190)                                                                                                                                                                                                                                                                                                                                                                                                                                                                                                                                                                                                                                                                                                                                                                                                                                                                                                                                                                                                                                                                                                                                                                                                                                                                                                                                                                                                                                                                                                                                                                                                                                                                                    | Effect of sorghum in HP (30/600)                                                                                                                                                                                                                                                                                                                                                 | Effect of poplar regardless of [Phosphate] (3/389)                 | Effect of poplar in LP (14/484)                                                                                                                           | Effect of poplar in HP (1/353) |
|                                                                      | Ves18<br>Ves92                             | Transp189<br>Ves84<br>Transp224<br>Ves103<br>Transp277<br>Ves82<br>NAR3<br>MD-2_25<br>Transp251<br>Ves7<br>Transp74<br>Ves60<br>Transp219 | Ves94<br>Transp280<br>Lip25<br>Transp26<br>Transp93<br>Lip14<br>Transp149<br>Transp135<br>TransVes9<br>Transp196<br>RiPT11<br>Lip12<br>Transp80<br>Lip24<br>Ves21<br>Ves28<br>Ves116<br>Desat8<br>Ves106<br>Transp296<br>Transp20<br>RiPT7<br>Transp195<br>AOAT<br>SugTrans46<br>TransVes8<br>Transp207<br>Transp151<br>SugTrans6<br>Transp282<br>GS3<br>NAR1<br>SugTrans33<br>Ves111<br>Transp75<br>Lip31<br>Transp164<br>Transp98<br>SugTrans24<br>Transp259<br>Transp158<br>Ves113<br>Lip28<br>Lip21<br>Desat3<br>Transp243<br>NAR4<br>Transp261<br>Transp281<br>Ves46<br>Transp121<br>Transp131<br>SugTrans22<br>SugTrans2<br>Transp292<br>Ves52<br>Transp3<br>Transp208<br>Transp172<br>Transp210<br>Transp88<br>Ves50<br>URE<br>Transp79<br>Ves55<br>Transp22<br>GintAMT3<br>Ves53<br>SugTrans30<br>Transp95<br>SugTrans1<br>SugTrans41<br>Ves51<br>Transp232<br>Transp237<br>RTC1<br>Lip44<br>Transp273<br>SugTrans4<br>Transp123<br>Transp197<br>Lip47<br>Transp218<br>GintAMT1<br>Ves78<br>Transp122<br>SugTrans54<br>NRT1<br>Ves76<br>SugTrans5<br>Ves97<br>Lip60<br>Transp24<br>TransVes3<br>Transp265<br>Ves80<br>Transp19<br>Ves11<br>Transp154<br>Transp92<br>Transp171<br>Transp167<br>OTA<br>Lip62<br>SugTrans12<br>Transp99<br>Lip56<br>NIR2<br>Ves115<br>Transp107<br>Transp245<br>Transp179<br>Transp162<br>Transp206<br>Transp187<br>GS1<br>OCT<br>Transp111<br>Desat5<br>Ves87<br>SugTrans14<br>Ves101<br>Lip52<br>AGK/AGPR<br>Lip57<br>Transp247<br>Transp240<br>Ves66<br>Ves85<br>Transp109<br>Elo2<br>Desat7<br>Ves14<br>SugTrans39<br>Transp101<br>Lip4<br>Desat2<br>Transp205<br>Transp84<br>Transp40<br>SugTrans34<br>Ves110<br>Bind1<br>Lip49<br>Polyphosphatase2<br>TransVes12<br>Ves91<br>Transp298<br>Transp270<br>Transp125<br>Ves65<br>Ves105<br>NIR3<br>Transp181<br>Transp174<br>Ves68<br>Transp231<br>Transp52<br>Ves2<br>Ves93<br>Transp97<br>Transp276<br>Transp199<br>Transp128<br>Ves120<br>Transp104<br>Transp283<br>Ves112<br>MD-2_1<br>SugTrans3<br>Ves34<br>CPS2<br>NAR5<br>Lip59<br>SugTrans16<br>Transp203<br>Transp305<br>Lip64<br>ODC<br>Transp43<br>Transp156<br>Lip36<br>Ves4<br>Ves10<br>Transp192<br>GS4<br>Transp285<br>Transp211<br>Transp216<br>Lip48<br>Transp254<br>Lip18<br>Ves27<br>ASL<br>Ves70<br>SugTrans20<br>AQPF2<br>Ves30<br>Transp279<br>Transp150<br>Ves54<br>Transp21<br>Transp127<br>Transp177<br>Ves96<br>SUC1<br>Ves40<br>Transp137<br>Transp41<br>Elo1<br>Lip65<br>SugTrans57<br>Ves1<br>Transp306<br>Desat9<br>TransVes4<br>SugTrans55<br>Lip3<br>SugTrans38<br>SugTrans27<br>MD-2_13<br>Transp256<br>VBA1<br>Transp77<br>OAT<br>GOGAT<br>Ves88<br>Transp103<br>Transp201<br>Bind4<br>Ves58<br>Ves119<br>SugTrans15<br>SugTrans26<br>Transp225<br>MST6 | MD-2_18<br>MD-2_9<br>Transp173                    |                                                                         |                                        |                                                |                                                | Transp222<br>Ves73<br>Transp248<br>Transp288<br>Ves20<br>Transp157 | SugTrans19<br>Transp255<br>Transp115<br>Desat3<br>GintAMT2<br>MD-2_13<br>Transp242 | Transp118<br>Transp195<br>Transp196<br>Desat6<br>Transp135<br>Ves21<br>SugTrans47<br>Transp261<br>Ves116<br>Ves106<br>NAR5<br>TransVes8<br>Transp167<br>Ves24<br>SugTrans6<br>Transp273<br>Transp151<br>GS3<br>AOAT<br>RiHAK<br>URE<br>SugTrans1<br>Transp20<br>RiPT6<br>Transp98<br>Transp174<br>Transp270<br>Transp179<br>Transp232<br>RiPT3<br>Transp259<br>NAR3<br>SugTrans30<br>Transp299<br>Transp218<br>Transp192<br>Ves53<br>Ves35<br>SugTrans33<br>Ves5<br>Transp75<br>Ves52<br>Transp201<br>Transp3<br>Transp154<br>Lip21<br>Transp128<br>Transp181<br>Ves31<br>SugTrans5<br>Lip60<br>Elo1<br>Transp172<br>Transp101<br>Ves99<br>Transp99<br>Transp163<br>RiPT1<br>Transp90<br>VBA2<br>Ves10<br>Lip64<br>SugTrans34<br>Ves98<br>Lip69<br>Ves105<br>Ves96<br>Transp104<br>Ves11<br>SugTrans57<br>Transp283<br>SugTrans39<br>Transp306<br>Ves56<br>Ves46<br>Transp108<br>Ves119<br>TransVes3<br>Lip48<br>SugTrans54<br>Transp19<br>Ves65<br>Transp5<br>Transp173<br>Transp238<br>MST5<br>TransVes12<br>RTC2<br>Phosphatase1<br>Lip65<br>SugTrans14<br>Transp279<br>Transp285<br>Transp177<br>SugTrans29<br>Transp38<br>GS4<br>Transp106<br>Transp290<br>SugTrans27<br>Transp289<br>Ves70<br>Transp156<br>SugTrans50<br>Transp137<br>Elo4<br>Ves2<br>Ves36<br>TransVes10<br>Transp12<br>Transp231<br>MST4<br>SugTrans55<br>Transp166<br>Bind1<br>SugTrans38<br>Transp276<br>Transp216<br>ASL<br>SugTrans58<br>TransVes4<br>Transp130<br>Transp10<br>RiPT9<br>Lip16<br>Transp142<br>Transp21<br>Transp165<br>SugTrans16<br>Transp168<br>Transp140<br>SugTrans49<br>Ves107<br>SugTrans40<br>SugTrans32<br>Transp252<br>Transp23<br>Transp234<br>Transp180<br>RiPT10<br>Ves86<br>Ves38<br>Ves15<br>Ves90<br>Ves82 | Transp144<br>Lip17<br>Lip8<br>Ves84<br>MD-2_12<br>Lip15<br>Transp17<br>SugTrans24<br>SugTrans21<br>Lip63<br>Transp159<br>Transp26<br>Transp224<br>Transp297<br>Desat8<br>TransVes17<br>SugTrans25<br>Transp153<br>SugTrans52<br>Transp178<br>Lip31<br>Transp44<br>Ves72<br>Lip66<br>Transp93<br>Ves103<br>SugTrans25<br>Transp143<br>Desat4<br>Transp251<br>Ves100<br>SugTrans51 | Transp209<br>Transp157<br>Ves20                                    | Transp222<br>Transp193<br>Transp223<br>Ves16<br>Ves73<br>Transp258<br>Transp115<br>SugTrans11<br>Transp277<br>Transp82<br>Transp264<br>Ves61<br>Transp248 | Ves25                          |
