# Supplementary material for: Imbalanced Regulation of Fungal Nutrient Transports According to Phosphate Availability in a Symbiocosm Formed by Poplar, Sorghum, and Rhizophagus irregularis
Source: PubMed Central journal article supplement (PMC6920215; doi:10.3389/fpls.2019.01617), 2019-12-12
Supplement: Table_6.pdf [file Table_6.pdf]

| Class             | Name                               | Average abundance of metabolites in poplar |        |        |        | Standard deviation |        |        |        | log2 ratios    |                 |                        |                 | 2-way ANOVA |                          |                          |                       |
|-------------------|------------------------------------|--------------------------------------------|--------|--------|--------|--------------------|--------|--------|--------|----------------|-----------------|------------------------|-----------------|-------------|--------------------------|--------------------------|-----------------------|
|                   |                                    | IP +AM                                     | hP +AM | IP -AM | hP -AM | IP +AM             | hP +AM | IP -AM | hP -AM | IP+AM vs hP+AM | IP-AM vs hP -AM | log2Ratio IP vs IP ctr | hP +AM vs hP-AM | +AM vs -AM  | Effect of mycorrhization | Effect of p-availability | Effect of interaction |
| Acids             | Aconitic acid, cis-                | 0,001                                      | 0,001  | 0,003  | 0,004  | 0,000              | 0,000  | 0,001  | 0,002  | 0,0            | -0,2            | -1,5                   | -1,7            | -1,6        | 0,006                    | 0,863                    | 0,934                 |
| Acids             | Benzoic acid                       | 0,009                                      | 0,010  | 0,019  | 0,011  | 0,001              | 0,001  | 0,005  | 0,002  | -0,2           | 0,7             | -1,0                   | -0,1            | -0,6        | 0,013                    | 0,182                    | 0,034                 |
| Acids             | Benzoic acid, 3,4-dihydroxy-       | 0,017                                      | 0,018  | 0,020  | 0,018  | 0,007              | 0,005  | 0,004  | 0,009  | -0,1           | 0,1             | -0,3                   | 0,0             | -0,2        | 0,750                    | 0,839                    | 0,602                 |
| Acids             | Benzoic acid, 4-hydroxy-           | 0,017                                      | 0,019  | 0,022  | 0,012  | 0,008              | 0,003  | 0,003  | 0,005  | -0,1           | 0,8             | -0,3                   | 0,6             | 0,1         | 0,767                    | 0,426                    | 0,162                 |
| Acids             | Citric acid                        | 0,026                                      | 0,025  | 0,023  | 0,014  | 0,004              | 0,002  | 0,002  | 0,007  | 0,1            | 0,6             | 0,2                    | 0,8             | 0,5         | 0,054                    | 0,125                    | 0,172                 |
| Acids             | Fumaric acid                       | 0,011                                      | 0,009  | 0,021  | 0,016  | 0,004              | 0,003  | 0,003  | 0,007  | 0,2            | 0,3             | -0,9                   | -0,8            | -0,9        | 0,038                    | 0,325                    | 0,814                 |
| Acids             | Glutaric acid, 2-hydroxy-          | 0,005                                      | 0,006  | 0,021  | 0,014  | 0,002              | 0,004  | 0,004  | 0,004  | -0,3           | 0,6             | -2,0                   | -1,1            | -1,6        | 0,003                    | 0,546                    | 0,420                 |
| Acids             | Glutaric acid, 2-oxo-              | 0,004                                      | 0,004  | 0,020  | 0,006  | 0,002              | 0,002  | 0,005  | 0,001  | 0,2            | 1,6             | -2,2                   | -0,8            | -1,7        | 0,009                    | 0,111                    | 0,180                 |
| Acids             | Glutaric acid, 3-hydroxy-3-methyl- | 0,008                                      | 0,011  | 0,022  | 0,013  | 0,004              | 0,005  | 0,003  | 0,005  | -0,4           | 0,8             | -1,4                   | -0,2            | -0,9        | 0,065                    | 0,549                    | 0,199                 |
| Acids             | Isocitric acid                     | 0,024                                      | 0,021  | 0,020  | 0,011  | 0,006              | 0,004  | 0,002  | 0,006  | 0,2            | 0,9             | 0,3                    | 1,0             | 0,6         | 0,054                    | 0,084                    | 0,190                 |
| Acids             | Lactic acid                        | 0,005                                      | 0,009  | 0,017  | 0,007  | 0,002              | 0,002  | 0,006  | 0,002  | -0,7           | 1,4             | -1,6                   | 0,4             | -0,7        | 0,083                    | 0,389                    | 0,013                 |
| Acids             | Malic acid                         | 0,016                                      | 0,019  | 0,021  | 0,013  | 0,006              | 0,007  | 0,002  | 0,001  | -0,2           | 0,7             | -0,4                   | 0,6             | 0,1         | 0,958                    | 0,412                    | 0,135                 |
| Acids             | Malic acid, 2-isopropyl-           | ND                                         | ND     | 0,018  | 0,009  | ND                 | ND     | 0,005  | 0,001  | ND             | 1,0             | ND                     | ND              | ND          | ND                       | ND                       | ND                    |
| Acids             | Malic acid, 2-methyl-              | ND                                         | ND     | 0,021  | 0,012  | ND                 | ND     | 0,004  | 0,002  | ND             | 0,8             | ND                     | ND              | ND          | ND                       | ND                       | ND                    |
| Acids             | Pyruvic acid                       | 0,021                                      | 0,021  | 0,019  | 0,015  | 0,005              | 0,002  | 0,002  | 0,004  | 0,0            | 0,3             | 0,2                    | 0,4             | 0,3         | 0,147                    | 0,400                    | 0,454                 |
| Acids             | Quinic acid                        | 0,003                                      | 0,005  | 0,005  | 0,003  | 0,001              | 0,001  | 0,002  | 0,002  | -0,8           | 0,9             | -1,0                   | 0,7             | -0,1        | 0,895                    | 0,723                    | 0,092                 |
| Acids             | Shikimic acid                      | 0,002                                      | 0,003  | 0,016  | 0,009  | 0,000              | 0,001  | 0,001  | 0,002  | -0,7           | 0,8             | -3,1                   | -1,5            | -2,3        | 0,000                    | 0,658                    | 0,008                 |
| Acids             | Succinic acid                      | 0,008                                      | 0,008  | 0,018  | 0,011  | 0,002              | 0,005  | 0,003  | 0,002  | 0,0            | 0,7             | -1,1                   | -0,5            | -0,8        | 0,032                    | 0,212                    | 0,552                 |
| Acids             | Vanillic acid                      | 0,015                                      | 0,014  | 0,021  | 0,015  | 0,005              | 0,005  | 0,003  | 0,004  | 0,2            | 0,5             | -0,4                   | -0,1            | -0,3        | 0,353                    | 0,258                    | 0,631                 |
| Alcohols          | Benzylalcohol                      | 0,009                                      | 0,010  | 0,016  | 0,008  | 0,002              | 0,001  | 0,007  | 0,003  | -0,1           | 1,0             | -0,8                   | 0,2             | -0,4        | 0,479                    | 0,180                    | 0,104                 |
| Aliphatic         | Heptacosane, n-                    | 0,013                                      | 0,015  | 0,013  | 0,012  | 0,003              | 0,001  | 0,001  | 0,004  | -0,1           | 0,2             | 0,1                    | 0,3             | 0,2         | 0,372                    | 0,855                    | 0,419                 |
| Aliphatic         | Tetracosane, n-                    | 0,001                                      | 0,001  | 0,001  | 0,001  | 0,000              | 0,000  | 0,000  | 0,000  | -0,2           | 0,2             | 0,3                    | 0,7             | 0,5         | 0,140                    | 0,778                    | 0,471                 |
| Aliphatic         | Triacotane, n-                     | 0,001                                      | 0,001  | 0,001  | 0,001  | 0,000              | 0,000  | 0,000  | 0,000  | 0,0            | -0,1            | 0,5                    | 0,4             | 0,5         | 0,098                    | 0,985                    | 0,968                 |
| Amino Acids       | Aspartic acid                      | 0,001                                      | 0,000  | 0,019  | 0,012  | 0,000              | 0,000  | 0,006  | 0,004  | 0,8            | 0,6             | -4,4                   | -4,7            | -4,5        | 0,000                    | 0,134                    | 0,845                 |
| Amino Acids       | Butanoic acid, 4-amino-            | 0,001                                      | 0,001  | 0,007  | 0,005  | 0,000              | 0,000  | 0,002  | 0,000  | 0,7            | 0,5             | -3,0                   | -3,1            | -3,0        | 0,000                    | 0,032                    | 0,572                 |
| Amino Acids       | Glutamic acid                      | 0,002                                      | 0,001  | 0,009  | 0,017  | 0,001              | 0,001  | 0,002  | 0,004  | 1,3            | -0,9            | -1,9                   | -4,0            | -2,9        | 0,001                    | 0,574                    | 0,090                 |
| Amino Acids       | Glycine                            | 0,006                                      | 0,004  | 0,011  | 0,007  | 0,001              | 0,001  | 0,003  | 0,002  | 0,4            | 0,6             | -1,0                   | -0,8            | -0,9        | 0,023                    | 0,112                    | 0,736                 |
| Amino Acids       | Isoleucine                         | 0,005                                      | 0,004  | 0,018  | 0,012  | 0,001              | 0,001  | 0,005  | 0,001  | 0,5            | 0,7             | -1,8                   | -1,7            | -1,8        | 0,000                    | 0,041                    | 0,873                 |
| Amino Acids       | Leucine                            | 0,007                                      | 0,007  | 0,019  | 0,015  | 0,001              | 0,001  | 0,003  | 0,006  | -0,1           | 0,3             | -1,4                   | -1,0            | -1,2        | 0,001                    | 0,483                    | 0,306                 |
| Amino Acids       | Phenylalanine                      | 0,002                                      | 0,001  | 0,019  | 0,012  | 0,001              | 0,000  | 0,005  | 0,003  | 0,8            | 0,7             | -3,5                   | -3,6            | -3,5        | 0,000                    | 0,048                    | 0,964                 |
| Amino Acids       | Pyroglutamic acid                  | 0,006                                      | 0,005  | 0,014  | 0,015  | 0,001              | 0,001  | 0,002  | 0,007  | 0,2            | 0,0             | -1,3                   | -1,6            | -1,4        | 0,001                    | 0,532                    | 0,762                 |
| Amino Acids       | Serine                             | 0,008                                      | 0,006  | 0,017  | 0,012  | 0,001              | 0,001  | 0,004  | 0,001  | 0,5            | 0,6             | -1,1                   | -1,0            | -1,1        | 0,000                    | 0,014                    | 0,765                 |
| Amino Acids       | Valine                             | 0,003                                      | 0,003  | 0,018  | 0,011  | 0,001              | 0,001  | 0,006  | 0,000  | -0,1           | 0,8             | -2,7                   | -1,8            | -2,3        | 0,000                    | 0,224                    | 0,118                 |
| Aromatic          | Catechol                           | 0,004                                      | 0,001  | 0,011  | 0,003  | 0,004              | 0,000  | 0,010  | 0,002  | 1,4            | 1,9             | -1,4                   | -1,0            | -1,3        | 0,245                    | 0,276                    | 0,598                 |
| Fatty Acids       | Dodecanoic acid                    | 0,011                                      | 0,012  | 0,011  | 0,011  | 0,002              | 0,003  | 0,003  | 0,001  | -0,1           | 0,1             | 0,1                    | 0,2             | 0,1         | 0,571                    | 0,879                    | 0,789                 |
| Fatty Acids       | Hexadecanoic acid                  | 0,018                                      | 0,019  | 0,020  | 0,017  | 0,002              | 0,002  | 0,005  | 0,005  | -0,1           | 0,3             | -0,1                   | 0,2             | 0,0         | 0,770                    | 0,643                    | 0,431                 |
| Fatty Acids       | Hexanoic acid                      | 0,017                                      | 0,015  | 0,013  | 0,017  | 0,007              | 0,002  | 0,002  | 0,006  | 0,1            | -0,4            | 0,3                    | -0,2            | 0,1         | 0,812                    | 0,746                    | 0,622                 |
| Fatty Acids       | Octadecanoic acid                  | 0,017                                      | 0,017  | 0,017  | 0,014  | 0,003              | 0,003  | 0,006  | 0,004  | 0,0            | 0,3             | 0,0                    | 0,3             | 0,1         | 0,516                    | 0,539                    | 0,622                 |
| N- Compounds      | Ethanolamine                       | 0,016                                      | 0,018  | 0,017  | 0,017  | 0,001              | 0,001  | 0,003  | 0,005  | -0,2           | 0,0             | -0,1                   | 0,0             | -0,1        | 0,927                    | 0,722                    | 0,594                 |
| N- Compounds      | Phenol, 2-amino-                   | 0,006                                      | 0,005  | 0,016  | 0,009  | 0,003              | 0,001  | 0,004  | 0,004  | 0,3            | 0,9             | -1,5                   | -0,9            | -1,3        | 0,019                    | 0,242                    | 0,306                 |
| N- Compounds      | Putrescine                         | 0,023                                      | 0,023  | 0,022  | 0,019  | 0,003              | 0,004  | 0,001  | 0,005  | 0,0            | 0,2             | 0,1                    | 0,3             | 0,2         | 0,362                    | 0,499                    | 0,616                 |
| N- Compounds      | Pyridine, 2-hydroxy-               | 0,017                                      | 0,021  | 0,023  | 0,018  | 0,004              | 0,004  | 0,001  | 0,006  | -0,3           | 0,3             | -0,4                   | 0,3             | -0,1        | 0,803                    | 0,872                    | 0,161                 |
| Phenylpropanoids  | Caffeic acid, cis-                 | 0,016                                      | 0,016  | 0,019  | 0,010  | 0,003              | 0,002  | 0,002  | 0,004  | 0,0            | 0,9             | -0,2                   | 0,7             | 0,2         | 0,298                    | 0,070                    | 0,075                 |
| Phenylpropanoids  | Caffeic acid, trans-               | 0,015                                      | 0,014  | 0,020  | 0,009  | 0,003              | 0,002  | 0,002  | 0,004  | 0,1            | 1,1             | -0,5                   | 0,6             | 0,0         | 0,666                    | 0,056                    | 0,070                 |
| Phenylpropanoids  | Cinnamic acid, 4-hydroxy-, trans-  | ND                                         | ND     | 0,012  | 0,008  | ND                 | ND     | 0,000  | 0,003  | ND             | 0,6             | ND                     | -0,5            | ND          | ND                       | ND                       | ND                    |
| Phenylpropanoids  | Epicatechin                        | 0,014                                      | 0,016  | 0,020  | 0,013  | 0,003              | 0,004  | 0,003  | 0,004  | -0,2           | 0,6             | -0,5                   | 0,3             | -0,1        | 0,668                    | 0,323                    | 0,138                 |
| Phenylpropanoids  | Ferulic acid, trans-               | 0,015                                      | 0,014  | 0,021  | 0,011  | 0,004              | 0,004  | 0,000  | 0,001  | 0,1            | 0,9             | -0,5                   | 0,4             | -0,1        | 0,703                    | 0,066                    | 0,121                 |
| Phenylpropanoids  | Quinic acid, 3-caffeoyl-, cis-     | 0,018                                      | 0,016  | 0,009  | 0,008  | 0,009              | 0,002  | 0,003  | 0,007  | 0,2            | 0,1             | 1,1                    | 1,0             | 1,0         | 0,102                    | 0,745                    | 0,572                 |
| Phenylpropanoids  | Quinic acid, 3-caffeoyl-, trans-   | 0,016                                      | 0,015  | 0,010  | 0,007  | 0,009              | 0,002  | 0,001  | 0,007  | 0,1            | 0,4             | 0,7                    | 1,0             | 0,8         | 0,155                    | 0,487                    | 0,347                 |
| Phosphates        | Fructose-6-phosphate               | 0,004                                      | 0,006  | 0,016  | 0,019  | 0,001              | 0,002  | 0,005  | 0,006  | -0,5           | -0,2            | -2,0                   | -1,7            | -1,9        | 0,003                    | 0,420                    | 0,806                 |
| Phosphates        | Glucose-6-phosphate                | 0,002                                      | 0,005  | 0,013  | 0,018  | 0,001              | 0,002  | 0,005  | 0,005  | -1,1           | -0,4            | -2,6                   | -2,0            | -2,2        | 0,000                    | 0,065                    | 0,453                 |
| Phosphates        | myo-Inositol-phosphate             | ND                                         | ND     | 0,001  | 0,003  | ND                 | ND     | 0,000  | 0,002  | ND             | ND              | -1,1                   | -1,2            | ND          | ND                       | ND                       | ND                    |
| Phosphates        | Phosphoric acid                    | 0,001                                      | 0,000  | 0,002  | 0,011  | 0,000              | 0,000  | 0,000  | 0,014  | 0,4            | -2,9            | -1,2                   | -4,5            | -3,5        | 0,042                    | 0,634                    | 0,468                 |
| Phosphates        | Phosphoric acid monomethyl ester   | 0,003                                      | 0,004  | 0,017  | 0,017  | 0,001              | 0,001  | 0,007  | 0,009  | -0,4           | 0,0             | -2,5                   | -2,2            | -2,4        | 0,001                    | 0,648                    | 0,676                 |
| Polyhydroxy Acids | Arabinonic acid-1,4-lactone        | 0,013                                      | 0,009  | 0,019  | 0,006  | 0,001              | 0,002  | 0,005  | 0,001  | 0,5            | 1,6             | -0,5                   | 0,5             | -0,2        | 0,914                    | 0,001                    | 0,041                 |
| Polyhydroxy Acids | Galactaric acid                    | 0,006                                      | 0,007  | 0,020  | 0,011  | 0,002              | 0,003  | 0,005  | 0,002  | -0,2           | 0,8             | -1,7                   | -0,6            | -1,2        | 0,011                    | 0,455                    | 0,209                 |
| Polyhydroxy Acids | Galactonic acid                    | 0,004                                      | 0,006  | 0,017  | 0,011  | 0,002              | 0,003  | 0,001  | 0,002  | -0,6           | 0,6             | -2,1                   | -0,8            | -1,4        | 0,002                    | 0,963                    | 0,100                 |
| Polyhydroxy Acids | Gluconic acid                      | 0,002                                      | 0,002  | 0,007  | 0,003  | 0,001              | 0,001  | 0,001  | 0,000  | -0,2           | 1,2             | -1,7                   | -0,3            | -1,1        | 0,018                    | 0,217                    | 0,139                 |
| Polyhydroxy Acids | Glyceric acid                      | 0,006                                      | 0,007  | 0,020  | 0,018  | 0,001              | 0,001  | 0,002  | 0,005  | -0,3           | 0,2             | -1,9                   | -1,4            | -1,6        | 0,000                    | 0,900                    | 0,238                 |
| Polyhydroxy Acids | Gulonic acid                       | 0,014                                      | 0,013  | 0,021  | 0,013  | 0,002              | 0,002  | 0,003  | 0,006  | 0,0            | 0,6             | -0,6                   | 0,0             | -0,4        | 0,425                    | 0,257                    | 0,311                 |
| Polyhydroxy Acids | Lyxonic acid-1,4-lactone           | 0,015                                      | 0,012  | 0,019  | 0,010  | 0,001              | 0,002  | 0,005  | 0,006  | 0,3            | 0,9             | -0,3                   | 0,3             | -0,1        | 0,772                    | 0,080                    | 0,292                 |
| Polyhydroxy Acids | Ribonic acid                       | 0,009                                      | 0,007  | 0,020  | 0,014  | 0,002              | 0,000  | 0,003  | 0,004  | 0,4            | 0,5             | -1,2                   | -1,1            | -1,1        | 0,001                    | 0,048                    | 0,686                 |
| Polyhydroxy Acids | Saccharic acid                     | 0,004                                      | 0,004  | 0,021  | 0,008  | 0,002              | 0,001  | 0,004  | 0,002  | 0,0            | 1,4             | -2,3                   | -0,9            | -1,8        | 0,001                    | 0,065                    | 0,039                 |
| Polyhydroxy Acids | Threonic acid                      | 0,004                                      | 0,003  | 0,019  | 0,009  | 0,001              | 0,001  | 0,003  | 0,004  | 0,5            | 1,1             | -2,2                   | -1,7            | -2,0        | 0,000                    | 0,019                    | 0,292                 |
| Polyols           | Arabitol                           | 0,001                                      | 0,001  | 0,002  | 0,002  | 0,000              | 0,000  | 0,000  | 0,001  | -0,2           | 0,3             | -1,4                   | -1,0            | -1,2        | 0,004                    | 0,722                    | 0,471                 |
| Polyols           | Galactitol                         | 0,017                                      | 0,011  | 0,013  | 0,018  | 0,005              | 0,002  | 0,001  | 0,005  | 0,5            | -0,5            | 0,3                    | -0,7            | -0,2        | 0,507                    | 0,853                    | 0,143                 |
| Polyols           | Glycerol                           | 0,006                                      | 0,011  | 0,007  | 0,008  | 0,000              | 0,006  | 0,002  | 0,002  | -0,9           | -0,1            | -0,3                   | 0,5             | 0,2         | 0,927                    | 0,307                    | 0,475                 |
| Polyols           | Inositol, myo-                     | 0,003                                      | 0,002  | 0,019  | 0,016  | 0,001              | 0,000  | 0,005  | 0,006  | 1,0            | 0,3             | -2,6                   | -3,3            | -2,8        | 0,000                    | 0,123                    | 0,422                 |
| Polyols           | Mannitol                           | 0,001                                      | 0,001  | 0,001  | 0,001  | 0,000              | 0,000  | 0,000  | 0,001  | 0,3            | -0,9            | 0,4                    | -0,7            | -0,2        | 0,896                    | 0,895                    | 0,468                 |
| Sugar Conjugates  | Galactinol                         | 0,003                                      | 0,002  | 0,008  | 0,016  | 0,001              | 0,000  | 0,002  | 0,012  | 0,7            | -1,0            | -1,4                   | -3,1            | -2,3        | 0,010                    | 0,829                    | 0,391                 |
| Sugar Conjugates  | Salicin                            | 0,006                                      | 0,004  | 0,014  | 0,005  | 0,005              | 0,001  | 0,008  | 0,002  | 0,7            | 1,6             | -1,2                   | -0,3            | -0,9        | 0,193                    | 0,137                    | 0,275                 |
